# Supplementary material for: Probing substrate binding inside a paramagnetic cavity: a NMR spectroscopy toolbox for combined experimental and theoretical investigation
Source: Royal Society of Chemistry journal article supplement (doi:10.1039/d4sc05432f), 2024-01-01
Supplement: d4sc05432f1.pdf [file d4sc05432f1.pdf]

## Supporting Information

### **Probing Substrate Binding inside a Paramagnetic Cavity: A NMR Spectroscopy Toolbox for Combined Experimental and Theoretical Investigation**

Sabyasachi Sarkar,<sup>a</sup> Chang-Quan Wu,<sup>b</sup> Santanu Manna,<sup>a</sup> Deepannita Samanta,<sup>a</sup> Peter P.-Y. Chen<sup>\*b</sup> and Sankar Prasad Rath<sup>\*a</sup>

<sup>a</sup>Department of Chemistry, Indian Institute of Technology Kanpur, Kanpur-208016, India. Email: sprath@iitk.ac.in

<sup>b</sup>Department of Chemistry, National Chung Hsing University, 145 Xingda Rd., South Dist., Taichung City 402, Taiwan. E-mail: pychen@dragon.nchu.edu.tw

#### **Instrumentation**

UV-vis spectra were recorded on an Agilent Cary8454 UV-vis spectrometer. <sup>1</sup>H NMR spectra were recorded on a JEOL 500 MHz instrument. The spectra for paramagnetic molecules were recorded over a 100-kHz bandwidth with 64 K data points and a 5-ms 90° pulse. The residual <sup>1</sup>H resonances of the solvents were used as a secondary reference. Electron paramagnetic resonance (EPR) spectra were obtained by using a Bruker EMX EPR spectrometer.

#### **X-ray Structure Solution and Refinement**

Single-crystal X-ray data were collected at 100 K on a Bruker SMART APEX CCD diffractometer equipped with a CRYO Industries' low-temperature apparatus, and intensity data were collected using graphite monochromated MoK $\alpha$  radiation ( $\lambda = 0.71073 \text{ \AA}$ ). The data integration and reduction were processed with SAINT software.<sup>1</sup> An absorption correction was applied.<sup>2</sup> The structure was solved by the direct method using SHELXS-97 and was refined on F2 by the full matrix least-squares technique using the SHELXL-2018 program package.<sup>[3]</sup> Non hydrogen atoms were refined anisotropically. In the refinement, hydrogens were treated as riding atoms using SHELXL default parameters.

## Computational Details

All geometry optimizations were carried out using the package *Gaussian 09*, Revision B.01<sup>3</sup> using unrestricted density functional method B97D in gas-phase and with solvent correction.<sup>4</sup> The basis set was LANL2DZ including for Fe, Br and 6-31G\*\* for C, H, N, F, O atoms. The self-consistent reaction field method was applied in all the optimizations to consider the solvent effect (chloroform). Frequency calculations were also carried out on all optimized structures to ensure that there were zero imaginary frequencies. Energies were taken from the Gaussian frequencies and contain zero point corrections at 298.15 K and 1 atm. All the TD-DFT calculations were performed at the  $\omega$ -B97XD level.<sup>5</sup> Visualization of the molecular orbitals and the corresponding diagrams were done using the *Chemcraft* software.<sup>6</sup> The electrostatic potentials were mapped onto the van der Waals surface with a data range from  $-0.02$  (red) to  $+0.02$  (blue) calculated at the B97D level of theory by taking coordinates directly from the crystal structures of the respective complexes, and were plotted by using VMD software version 1.9.2.<sup>7</sup> DFT calculations to investigate the  $^{19}\text{F}$  NMR spectra of *exo-exo* and *exo-endo* dimers were employed within the ADF program.<sup>8,9</sup> Spin-unrestricted density functional calculations were executed for all complexes in this study. The spin state adopted in the DFT calculations is assigned as  $S = 10$  ( $S_{\text{Fe1}} = +5/2$ ,  $S_{\text{Fe2}} = +5/2$ ). Molecular geometries were attained by optimising the X-ray crystal structures, utilizing BP86\_D3 in conjunction with TZ2P (triple- $\zeta$  plus double polarization function) basis set for all atoms.<sup>10,11</sup> The spin density, NMR parameters, and free energy calculations were conducted adopting ZORA-scalar-BP86/TZ2P (COSMO/ $\text{CH}_2\text{Cl}_2$ ) level of theory. The calculation of hyperfine coupling A-tensors is implemented by the CPL code of the Amsterdam Density Functional program as a second derivative property. This involves incorporating spin-orbit coupling and nuclear magnetic field perturbations within the two-component relativistic zeroth-order regular approximation (ZORA). An all-electron basis set for the Fluorine nucleus is used to accurately evaluate the spin-polarization density at the nucleus.<sup>12</sup> The orbital (or diamagnetic) shift in Eq. (1) of the text is determined by calculating the disparity between the chemical shielding of a reference compound and the orbital-induced effect on the chemical shielding of the compound under investigation,  $\delta_{orb} = \sigma_{ref} - \sigma_{orb}$ . This shift can also be assessed using the diamagnetic analog. In our investigation,  $\text{CFCl}_3$  (160 ppm) served as the reference compound, and the Zn porphyrin dimer was employed to calculate the orbital shift.<sup>13</sup>

### Estimation of $g_{xx}$ , $g_{yy}$ and $g_{zz}$

In the context of high-spin iron, the  $g_{//}$  value represents the actual  $g_{zz}$  value, showing a slight deviation from the expected  $g_e = 2.00232$  of a free spin due to spin-orbital coupling. Meanwhile, the experimental  $g_{xx}$  and  $g_{yy}$  values serve as effective  $g$  values, influenced by the zero-field effect and potential spin-admixed contributions between sextet and quartet spin states. While simulations can estimate the  $g_{xx}$  and  $g_{yy}$  values, it's important to note that these effective  $g$  values, derived from the 77K EPR data, may not perfectly correspond to those obtained at room temperature in a solution (if detectable). Therefore, in addition to conducting several possible NMR dipolar shift hypotheses to speculate on the actual  $g$  values of the complexes in solution, our subsequent analysis will also use the EPR  $g_{zz}$  value as a guide to systematically explore the changes in  $g_{xx}$  and  $g_{yy}$  values to produce a more comprehensive understanding of the impact of dipolar transitions. Thus, it is evaluated through the data regarding the *ortho*-fluorine (*exo*-phenol) of **2b**. Herein, based on the EPR data (refer to the Supplementary Information) indicating  $g_{zz} = 1.99$ , the dipolar shift of *ortho*-F is determined by  $\delta_{dip}^{MC} = \delta_{obs}(experiment) - \delta_{orb}(DFT) - \delta_{con}(DFT)$ , and subsequently applied in Eq. (3) in the text, utilizing the experimental  $^{19}\text{F}$  NMR chemical shift of  $-14.6$  ppm, DFT-calculated averaged orbital and contact shift,  $-136$  and  $99.1$  ppm to obtain  $\delta_{dip}^{MC} = 21.9$  ppm. When setting  $S = 10$ ,  $g_{zz} = 1.99$ , and considering the geometric factors of *o*-F for *exo*-phenol in **2b**, Eq. (2) simplifies to:

$$21.9 = 3.4841 \times \left[ (2 \times 1.99^2 - g_{xx}^2 - g_{yy}^2) \times \frac{(3 \cos^2 \theta - 1)}{r^3} + (g_{xx}^2 - g_{yy}^2) \times 3 \times \frac{\sin^2 \theta \cos 2\phi}{r^3} \right]$$

Here, the averaged  $\frac{(3 \cos^2 \theta - 1)}{r^3}$  and  $\frac{\sin^2 \theta \cos 2\phi}{r^3}$  terms are evaluated to be 8.37 and 4.34, respectively, as indicated in Table S3. Examining the plotted relationship between metal-centered dipolar shifts and  $g_{yy}$  values for various  $g_{xx}$  values ranging from 1.95 to 2.15 with a 0.05 interval reveals numerous possibilities for  $g$  factors, as shown in Figure S17. However, when specifying  $g_{xx} = 2.10$  and  $g_{yy} = 1.94$ , the calculated isotropic  $g$  value,  $(g_{xx} + g_{yy} + g_{zz})/3$ , is 2.01 very close to the spin-only value of 2.0023 for high-spin ( $S = 5/2$ )  $\text{Fe}^{3+}$  complexes under weak crystal fields.<sup>14</sup>

## Experimental Section:

### Materials:

1,2-Bis[ $\mu$ -oxo iron(III)-5-(2,3,7,8,12,13,17,18-octaethylporphyrinyl)]-pyrrole was prepared by using previously reported methods.<sup>15</sup> Reagents and solvents were purchased from commercial sources and were purified by using standard procedures before use.

### Synthesis of 2a:

100 mg of **1** (0.075 mmol) was dissolved in dichloromethane (50 mL) and 2,4,6-trinitrophenol, HTNP (37.8 mg, 0.165 mmol) was added. The mixture was stirred for 10 min, and during the progress of the reaction, the green solution changed to brown. It was then evaporated to complete dryness. The solid thus obtained was dissolved in a minimum volume of dichloromethane and carefully layered with *n*-hexane. After 7-8 d, a dark-brown crystalline solid was formed that was then collected by filtration, washed well with the mother liquor, and dried under vacuum. Yield: 100 mg (75%). <sup>1</sup>H NMR (CDCl<sub>3</sub>, 298 K):  $\delta$  = -46.0, -49.3, -59.5, -63.3 (*meso*-H); 5.8, 6.2(4) 6.5(3) (CH<sub>3</sub>); 1.4 (CH<sub>3</sub>-py); 2.8 (CH<sub>2</sub>-py); 28.6, 33.2, 37.2, 38.2, 38.8, 39.2, 39.6, 40.6, 44.5, 45.8, 46.5, 48.2, 49.6, 50.0, 50.4, 52.0 (CH<sub>2</sub>); 67.3, 118.2 (CH<sub>2</sub>(b)); 59.2, 69.1 (*m*-H) ppm; UV-vis (chloroform) [ $\lambda_{\max}$ , nm ( $\epsilon$ , M<sup>-1</sup> cm<sup>-1</sup>): 355 (1.2 × 10<sup>5</sup>), 380 (1.3 × 10<sup>5</sup>), 513 (1.4 × 10<sup>4</sup>), 550 (1.0 × 10<sup>3</sup>), 643 nm (5.5 × 10<sup>3</sup>).

Same synthetic protocol that of **2a** has been followed for the synthesis of other phenolato species (**2b-2i**).

### Synthesis of 2b:

Yield: 98 mg (78%); <sup>1</sup>H NMR (CDCl<sub>3</sub>, 298 K):  $\delta$  = -38.8, -41.2, -46.0, -51.0 (*meso*-H); 4.2(2), 4.8, 5.4(3), 6.3(2) (CH<sub>3</sub>); 1.4 (CH<sub>3</sub>-py); 2.8 (CH<sub>2</sub>-py); 31.0(2), 33.3(2), 36.3(3), 37.9(2), 42.9, 44.6(2), 46.3(2), 54.3(2) (CH<sub>2</sub>); 84.8, 89.6 (CH<sub>2</sub>(b)); <sup>19</sup>F NMR (C<sub>6</sub>D<sub>6</sub>, 298 K):  $\delta$  = 29.7 (*p*-*F*<sub>exo</sub>), -14.6 (*o*-*F*<sub>exo</sub>), -210.2 (*m*-*F*<sub>exo</sub>), -226.5 (*m*-*F*<sub>endo</sub>), -218.3, 18.7 (*o*-*F*<sub>endo</sub>) ppm; UV-vis (chloroform) [ $\lambda_{\max}$ , nm ( $\epsilon$ , M<sup>-1</sup> cm<sup>-1</sup>): 367 (1.2 × 10<sup>5</sup>), 372 (1.1 × 10<sup>5</sup>), 394 (9.3 × 10<sup>3</sup>), 504 (1.3 × 10<sup>4</sup>), 584 (1.0 × 10<sup>4</sup>), 628 (7.3 × 10<sup>3</sup>).

**Synthesis of 2c:**

Yield: 99 mg (83%);  $^1\text{H NMR}$  ( $\text{CDCl}_3$ , 298 K):  $\delta = -37.3, -41.1, -46.7, -49.9$  (*meso-H*); 3.5, 4.1, 4.8, 5.2(3), 5.8, 6.4 ( $\text{CH}_3$ ); 1.6 ( $\text{CH}_3\text{-py}$ ); 2.9 ( $\text{CH}_2\text{-py}$ ); 31.2(2), 32.7(2), 34.4, 35.7(2), 37.3(2), 38.1, 41.8, 42.6, 44.2(2), 44.7, 46.5( $\text{CH}_2$ ); 77.5, 97.9 ( $\text{CH}_2(\text{b})$ ); 52.4, 62.3 (*m-H*) ppm; UV-vis (chloroform) [ $\lambda_{\text{max}}$ , nm ( $\epsilon$ ,  $\text{M}^{-1} \text{cm}^{-1}$ )]: 363 ( $1.3 \times 10^5$ ), 395 ( $1.1 \times 10^5$ ), 508 ( $1.9 \times 10^4$ ), 541 ( $1.2 \times 10^4$ ), 627 nm ( $8.0 \times 10^3$ ).

**Synthesis of 2d:**

Yield: 104 mg (85%);  $^1\text{H NMR}$  ( $\text{CDCl}_3$ , 298 K):  $\delta = -36.9, -43.8, -49.2, -57.9$  (*meso-H*); 4.9, 5.2, 5.5(3), 6.0(3) ( $\text{CH}_3$ ); 1.4 ( $\text{CH}_3\text{-py}$ ); 3.0 ( $\text{CH}_2\text{-py}$ ); 27.7, 28.4, 30.9, 33.8, 36.1(2), 37.2(2), 40.8, 42.2(3), 43.8, 55.9(2), 57.4 ( $\text{CH}_2$ ); 82.1, 95.1 ( $\text{CH}_2(\text{b})$ );  $^{19}\text{F NMR}$  ( $\text{CDCl}_3$ , 298 K):  $\delta = -29.2$  (*o-F<sub>exo</sub>*); -171.7 (*o-F<sub>endo</sub>*) ppm; UV-vis (chloroform) [ $\lambda_{\text{max}}$ , nm ( $\epsilon$ ,  $\text{M}^{-1} \text{cm}^{-1}$ )]: 349 ( $1.0 \times 10^5$ ), 390 ( $1.4 \times 10^5$ ), 572 ( $0.6 \times 10^3$ ), 599 ( $0.3 \times 10^3$ ).

**Synthesis of 2e:**

Yield: 107 mg (86%);  $^1\text{H NMR}$  ( $\text{CDCl}_3$ , 298 K):  $\delta = -38.9, -43.7, -51.1, -56.9$  (*meso-H*); 5.2(3), 5.4(3), 6.2(2) ( $\text{CH}_3$ ); 1.3 ( $\text{CH}_3\text{-py}$ ); 3.1 ( $\text{CH}_2\text{-py}$ ); 26.9, 32.3(2), 34.2, 34.9(2), 36.5(2), 37.6(2), 41.8(3), 43.5, 56.9(2) ( $\text{CH}_2$ ); 81.7, 98.3 ( $\text{CH}_2(\text{b})$ ); 54.1, 56.3 (*m-H*) ppm;  $^{19}\text{F NMR}$  ( $\text{CDCl}_3$ , 298 K):  $\delta = 55.2$  (*p-F<sub>exo</sub>*), -32.9 (*o-F<sub>exo</sub>*); -170.1 (*o-F<sub>endo</sub>*) ppm; UV-vis (chloroform) [ $\lambda_{\text{max}}$ , nm ( $\epsilon$ ,  $\text{M}^{-1} \text{cm}^{-1}$ )]: 369 ( $6.0 \times 10^4$ ), 397 ( $5.0 \times 10^4$ ), 510 ( $0.7 \times 10^3$ ), 544 ( $0.5 \times 10^3$ ), 630 ( $0.3 \times 10^3$ ).

**Synthesis of 2f:**

Yield: 93 mg (72%);  $^1\text{H NMR}$  ( $\text{CDCl}_3$ , 298 K):  $\delta = -45.2(2)$  (*meso-H*); 4.6, 6.5, 7.1, 7.3 ( $\text{CH}_3$ ); 1.4 ( $\text{CH}_3\text{-py}$ ); 2.8 ( $\text{CH}_2\text{-py}$ ); 24.1, 27.3, 30.2(2), 31.9, 32.9, 34.3, 37.4 ( $\text{CH}_2$ ); 102.0 ( $\text{CH}_2(\text{b})$ ); -62.1 (*o-H*); 40.4 (*m-H*) ppm; UV-vis (chloroform) [ $\lambda_{\text{max}}$ , nm ( $\epsilon$ ,  $\text{M}^{-1} \text{cm}^{-1}$ )]: 350 ( $6.4 \times 10^4$ ), 402 ( $1.1 \times 10^5$ ), 492 ( $2.0 \times 10^4$ ), 534 ( $1.7 \times 10^4$ ), 610 ( $1.5 \times 10^4$ ).

**Synthesis of 2g:**

Yield: 104 mg (70%);  $^1\text{H NMR}$  ( $\text{CDCl}_3$ , 298 K):  $\delta = -54.1, -59.1$  (*meso-H*); 4.7, 4.9, 5.8, 6.0 ( $\text{CH}_3$ ); 1.4 ( $\text{CH}_3\text{-py}$ ); 2.8 ( $\text{CH}_2\text{-py}$ ); 30.0, 34.9(2), 39.3, 40.9, 42.4, 46.4, 50.8 ( $\text{CH}_2$ ); 74.2 ( $\text{CH}_2(\text{b})$ ); 70.4 (*m-H*) ppm; UV-vis (chloroform) [ $\lambda_{\text{max}}$ , nm ( $\epsilon$ ,  $\text{M}^{-1} \text{cm}^{-1}$ )]: 398 ( $1.3 \times 10^5$ ), 511 ( $2.2 \times 10^4$ ), 575 ( $1.4 \times 10^4$ ), 644 ( $7.5 \times 10^3$ ).

**Synthesis of 2h:**

Yield: 94 mg (79%);  $^1\text{H NMR}$  ( $\text{CDCl}_3$ , 298 K):  $\delta = -47.0(2)$  (*meso-H*); 4.9, 5.8, 6.4(2) ( $\text{CH}_3$ ); 1.4 ( $\text{CH}_3\text{-py}$ ); 2.8 ( $\text{CH}_2\text{-py}$ ); 28.2, 29.4, 32.4, 33.5, 37.1, 38.6, 40.6, 47.4 ( $\text{CH}_2$ ); 54.2 ppm ( $\text{CH}_2(\text{b})$ );  $-107.0$  (*o-H*); 68.2, 78.9 (*m-H*);  $-2.9$  (*o-CH}\_3*);  $-22.2$  (*o-CH}\_2*);  $^{19}\text{F NMR}$  ( $\text{CDCl}_3$ , 298 K):  $\delta = 97.1$  (*p-F}\_{\text{exo}}*) ppm; UV-vis (chloroform) [ $\lambda_{\text{max}}$ , nm ( $\epsilon$ ,  $\text{M}^{-1} \text{cm}^{-1}$ )]: 355 ( $6.7 \times 10^4$ ), 391 ( $1.1 \times 10^5$ ), 505 ( $1.2 \times 10^3$ ), 543 ( $0.9 \times 10^3$ ), 614 ( $0.7 \times 10^3$ ).

**Synthesis of 2i:**

Yield: 84 mg (72%);  $^1\text{H NMR}$  ( $\text{CDCl}_3$ , 298 K):  $\delta = -47.5(2)$  (*meso-H*); 6.3(2), 6.6(2) ( $\text{CH}_3$ ); 1.4 ( $\text{CH}_3\text{-py}$ ); 2.8 ( $\text{CH}_2\text{-py}$ ); 27.7, 31.9, 34.4(2), 36.1, 39.2(2), 47.9 ( $\text{CH}_2$ ); 81.8 ( $\text{CH}_2(\text{b})$ );  $-89.0$  (*o-H*),  $-26.4$  (*p-H*),  $-30.2$  (*m-CH}\_3*) ppm; UV-vis (chloroform) [ $\lambda_{\text{max}}$ , nm ( $\epsilon$ ,  $\text{M}^{-1} \text{cm}^{-1}$ )]: 336 ( $7.2 \times 10^4$ ), 389 ( $1.0 \times 10^5$ ), 565 ( $9.5 \times 10^3$ ).

**References:**

1. SAINT+, 6.02 ed., Bruker AXS, Madison, WI, 1999.
2. G. M. Sheldrick, SADABS 2.0, 2000.
3. G. M. Sheldrick, *SHELXL-2018: Program for Crystal Structure Refinement*; University of Göttingen: Göttingen, Germany, 2018.
4. M. J. T. Frisch, G. W. Trucks, H. B. Schlegel, G. E. Scuseria, M. A. C. Robb, J. R. Cheeseman, G. Scalmani, V. Barone, G. A. N. B. Mennucci, H. Petersson, M. Caricato, X. Li, H. Hratchian, A. F. Izmaylov, J. Bloino, G. Zheng, J. L. Sonnenberg, M. Hada, M. Ehara, K. Toyota, R. Fukuda, J. Hasegawa, M. Ishida, Y. K. T. Nakajima, O. Honda, H. Nakai, T. Vreven, J. A. Montgomery, J. E. O. Peralta Jr., F. Oligaro, M. Bearpark, J. J. Heyd, E. Brothers, V. N. Kudin, K. K.N. R. Staroverov, J. Normand, K. Raghavachari, A. B. Rendell, S. S. Iyengar, J. Tomasi, M. Cossi, J. M. Rega, M. Millam, J. E. Knox, J. B.

- Cross, V. Bakken, C. J. Adamo, J. Gomperts, R. E. Stratmann, O. Yazyev, A. J. Austin, R. Cammi, J. W. Pomelli, J. W. Ochterski, R. L. Martin, K. Z. Morokuma, V. G. Zarkrzewski, G. A. Voth, P. Salvador, J. J. D. Dannenberg, S. Dapprich, A. D. Daniels, Ö. Farkas, J. B. Foresman, J. V. Ortiz, J. Cioslowski, D. J. Fox *Gaussian 09, Revision B.01*, Gaussian, Inc., Wallingford, CT, 2010.
5. A. D. Becke, *J. Chem. Phys.*, 1997, **107**, 8554-8560.
  6. J. -D. Chai, *Phys. Chem. Chem. Phys.*, 2008, **10**, 6615-6620.
  7. <http://www.chemcraftprog.com>.
  8. W. Humphrey, A. Dalke, K. Schulten, *J. Molec. Graphics*, 1996, **14**, 33-38.
  9. *ADF2019.3, SCM, Theoretical Chemistry*, Vrije Universiteit, Amsterdam, The Netherlands, <http://www.scm.com>.
  10. G. Te. Velde, F. M. Bickelhaupt, E. J. Baerends, C. F. Guerra, S. J. A. van Gisbergen, J. G. Snijders and T. Ziegler, *J. Comput. Chem.*, 2001, **22**, 931-967.
  11. A. D. Becke, *Phys. Rev. A*, 1988, **38**, 3098-3100.
  12. J. P. Perdew, *Phys. Rev. B*, 1986, **33**, 8822-8824.
  13. J. Autschbach, S. Patchkovskii and B. Pritchard, *J. Chem. Theory Comput.*, 2011, **7**, 2175-2188.
  14. A. Kehl, M. Hiller, F. Hecker, I. Tkach, S. Dechert, M. Bennati and A. Meyer, *J. J. Magn. Reson.*, 2021, **333**, 107091-107101.
  15. J. S. Bolge and H. F. Symmons, *Proc. Phys. Soc.* 1959, **73**, 531-532.

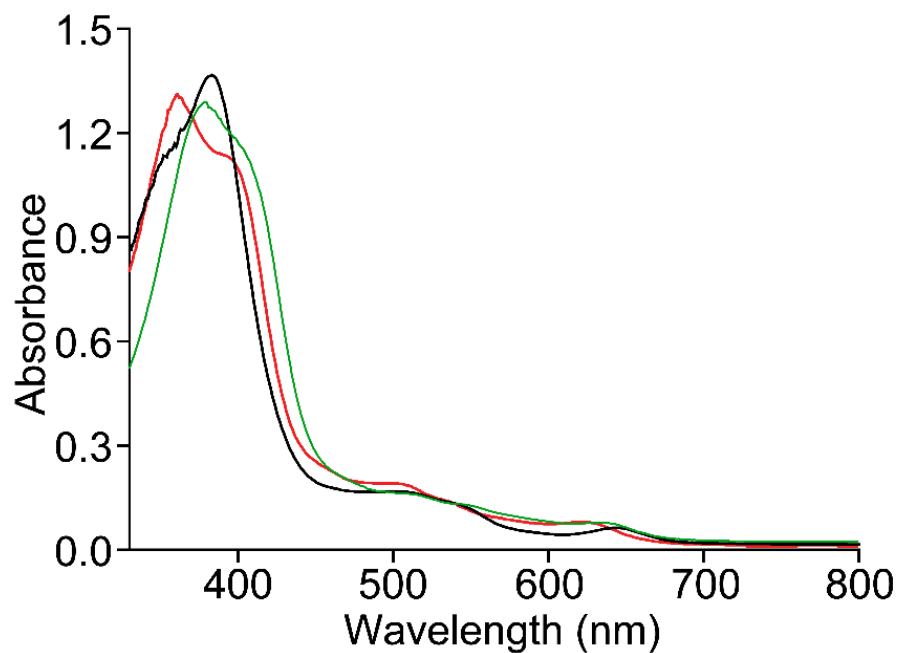

**Figure S1.** UV-vis spectra of **2a** (black trace), **2e** (green trace) and **2c** (red trace) in  $\text{CHCl}_3$  at 298 K.

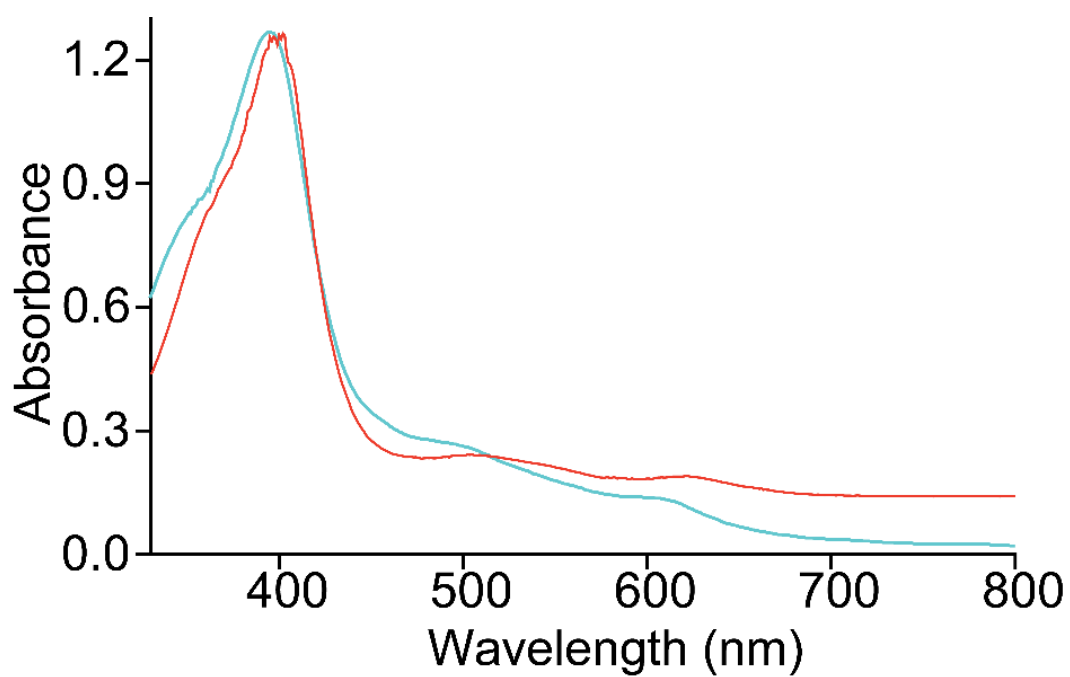

**Figure S2.** UV-vis spectra of **2i** (blue trace) and **2h** (red trace) in  $\text{CHCl}_3$  at 298 K.



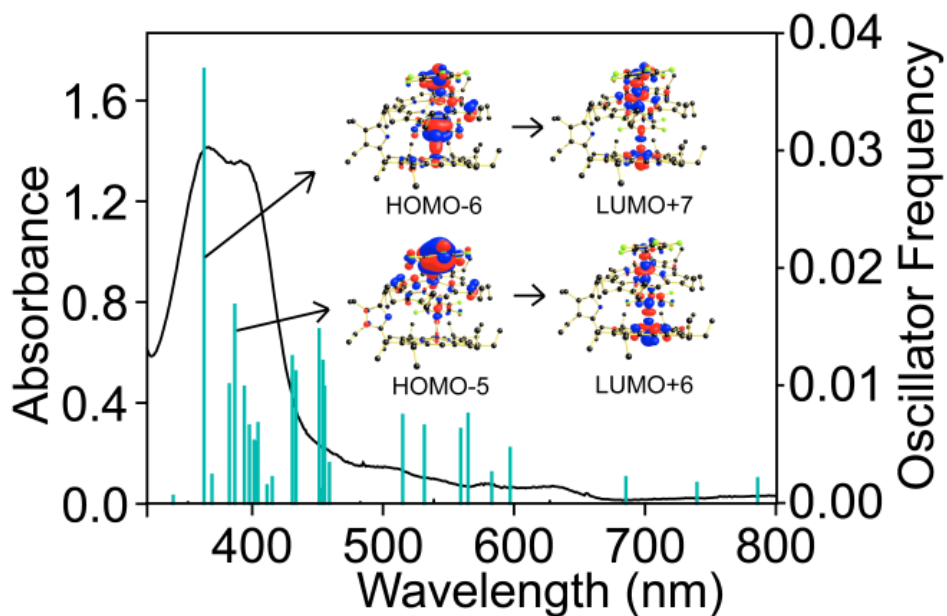

**Figure S3.** Absorption spectra (curved line, left axis) in  $\text{CH}_2\text{Cl}_2$  and oscillator strengths (vertical line, right axis) of **2b** obtained from TD-DFT calculations at the  $\omega$ -B97XD/6-31G\*\*/LANL2DZ level of theory.

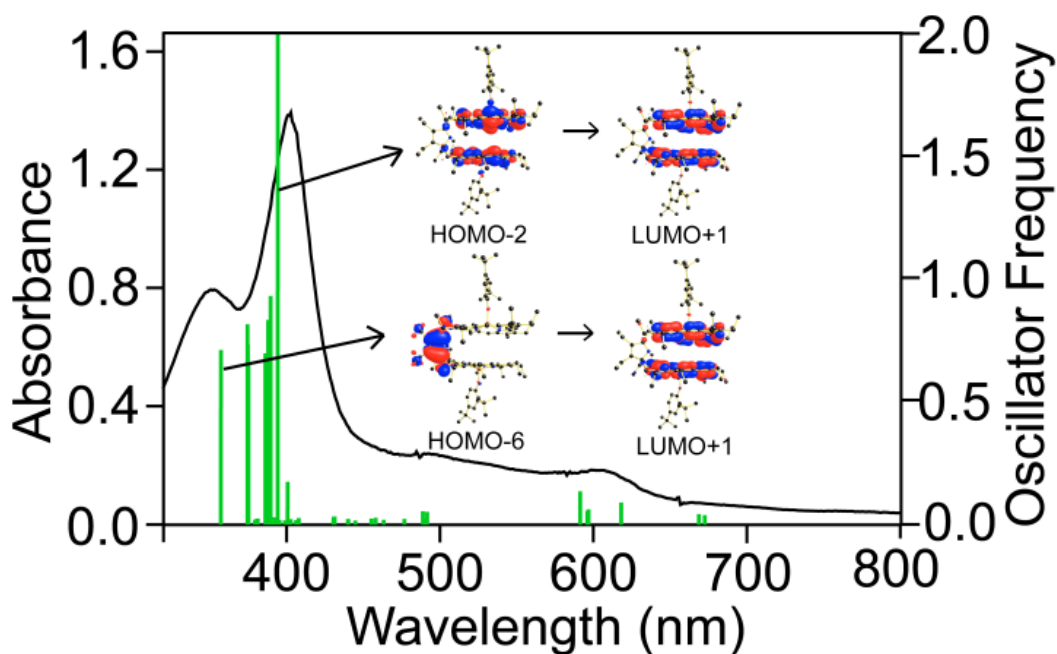

**Figure S4.** Absorption spectra (curved line, left axis) in  $\text{CH}_2\text{Cl}_2$  and oscillator strengths (vertical line, right axis) of **2f** obtained from TD-DFT calculations at the  $\omega$ -B97XD/6-31G\*\*/LANL2DZ level of theory.

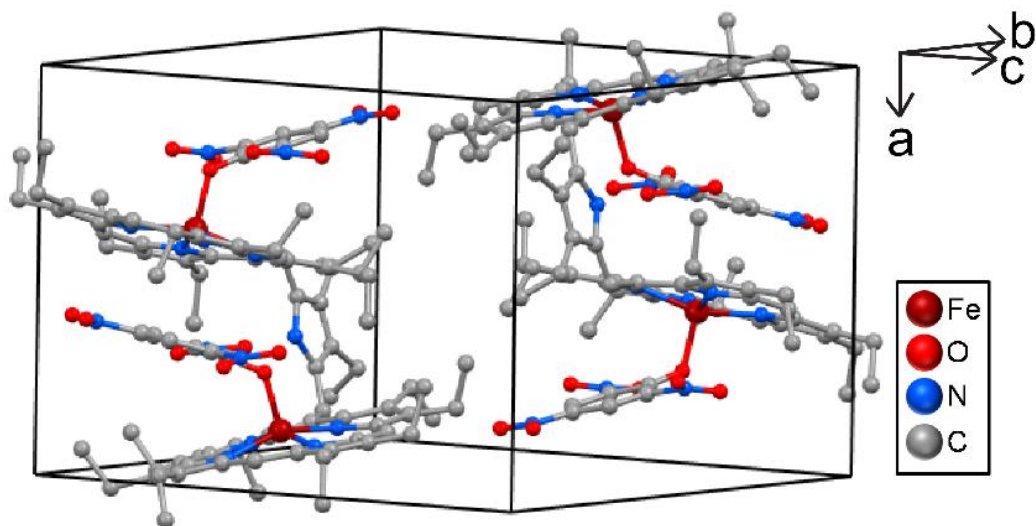

**Figure S5.** Diagram illustrating the packing of **2a** in the unit cell (H-atoms have been omitted for clarity).

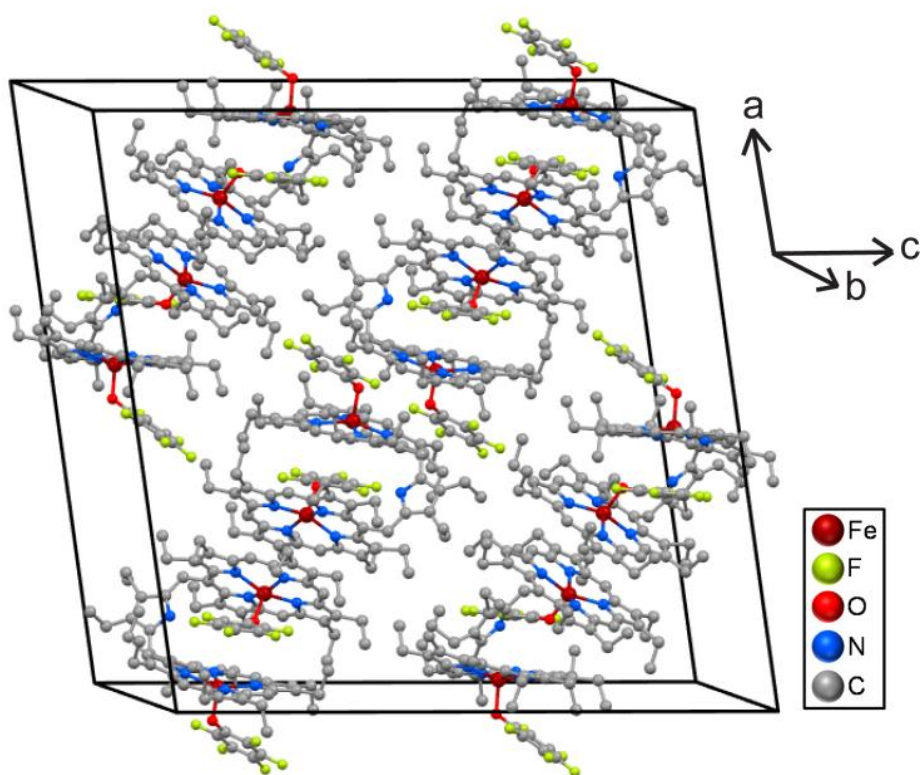

**Figure S6.** Diagram illustrating the packing of **2b** in the unit cell (H-atoms have been omitted for clarity).

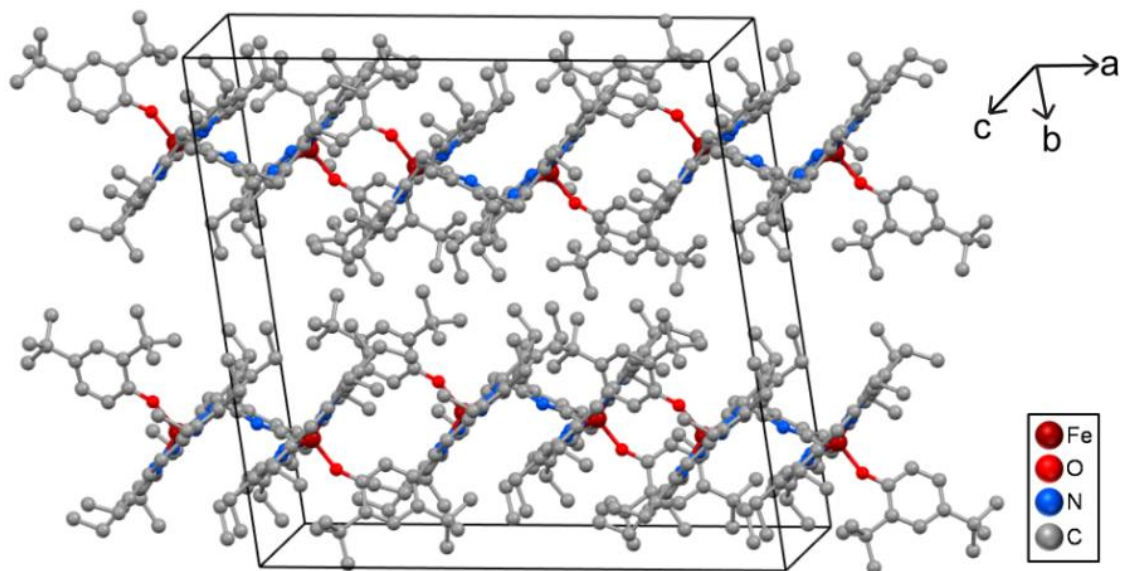

**Figure S7.** Diagram illustrating the packing of **2f** in the unit cell (H-atoms have been omitted for clarity).

**Table S1.** Selected bond distances (Å) and angles (°).

| Bond distances | <b>2a</b>  | <b>2b</b> | <b>2f</b>  |
|----------------|------------|-----------|------------|
| Fe1–N1         | 2.047(3)   | 2.057(5)  | 2.0577(13) |
| Fe1–N2         | 2.062(3)   | 2.057(6)  | 2.0812(14) |
| Fe1–N3         | 2.071(3)   | 2.082(6)  | 2.0733(13) |
| Fe1–N4         | 2.061(3)   | 2.053(6)  | 2.0724(14) |
| Fe2–N5         | 2.060(3)   | 2.049(4)  | -          |
| Fe2–N6         | 2.057(4)   | 2.055(4)  | -          |
| Fe2–N7         | 2.047(3)   | 2.059(4)  | -          |
| Fe2–N8         | 2.053(3)   | 2.060(4)  | -          |
| Fe1–O1         | 1.918(3)   | 1.874(4)  | 1.8180(11) |
| Fe2–O2         | 1.911(3)   | 1.914(4)  | -          |
| Bond angles    |            |           |            |
| N1–Fe1–N2      | 88.96(12)  | 89.2(2)   | 89.48(5)   |
| N1–Fe1–N3      | 157.69(13) | 157.5(2)  | 155.81(5)  |
| N1–Fe1–N4      | 85.91(13)  | 86.8(2)   | 85.83(5)   |
| N2–Fe1–N3      | 86.31(13)  | 86.5(3)   | 85.29(5)   |
| N2–Fe1–N4      | 154.46(13) | 158.0(2)  | 155.50(5)  |
| N3–Fe1–N4      | 89.01(14)  | 88.9(3)   | 89.20(5)   |
| N5–Fe2–N6      | 89.74(13)  | 88.68(17) | -          |
| N5–Fe2–N7      | 160.19(13) | 154.4(2)  | -          |
| N5–Fe2–N8      | 84.99(13)  | 86.47(17) | -          |
| N6–Fe2–N7      | 85.91(14)  | 86.66(17) | -          |
| N6–Fe2–N8      | 153.10(13) | 158.3(2)  | -          |
| N7–Fe2–N8      | 90.19(14)  | 88.60(17) | -          |

**Table S2.** Selected structural parameters of **2a**, **2b** and **2f** obtained from DFT calculations.

| Complex   | Fe-N <sub>p</sub> <sup>a</sup> | Fe-O <sup>b</sup> (L) | Fe-O-C <sup>c</sup> | $\Delta_{24}^{\text{Fe}d}$ | $\Delta_{24}^e$ | $\tau^f$   | Fe...Fe <sup>g</sup> |
|-----------|--------------------------------|-----------------------|---------------------|----------------------------|-----------------|------------|----------------------|
| <b>2a</b> | Core I                         | 2.089[2.060(3)]       | 1.957[1.918(3)]     | 137.3[128.5(2)]            | 0.43[0.46]      | 0.04[0.08] | 7.52[7.74]           |
|           | Core II                        | 2.083[2.054(3)]       | 1.963[1.911(3)]     | 135.5[126.7(3)]            | 0.43[0.42]      | 0.13[0.12] | 1.10[0.90]           |
| <b>2b</b> | Core I                         | 2.094[2.062(6)]       | 1.901[1.874(4)]     | 122.8[126.6(4)]            | 0.37[0.39]      | 0.04[0.02] | 1.17[1.56]           |
|           | Core II                        | 2.089[2.055(4)]       | 1.940[1.914(4)]     | 119.1[121.9(4)]            | 0.48[0.47]      | 0.11[0.16] | 0.08[0.10]           |
| <b>2f</b> |                                | 2.088[2.071(13)]      | 1.895[1.818(11)]    | 146.8[151.55(11)]          | 0.51[0.47]      | 0.14[0.12] | 6.21                 |

<sup>a</sup>Average value in Å. <sup>b</sup>Distance (in Å) of axial ligand L. <sup>c</sup>Angle (in °). <sup>d</sup>Displacement (in Å) of iron from the least-squares plane of C<sub>20</sub>N<sub>4</sub> porphyrinato core. <sup>e</sup>Average displacement (in Å) of atoms from the least-squares plane of C<sub>20</sub>N<sub>4</sub> porphyrinato core. <sup>f</sup>tilt-angle (in °). <sup>g</sup>Non-bonding distance (in Å) between two iron(III) centers in a molecule. Parentheses contain the experimental distances from the X-ray structure of the corresponding complexes.

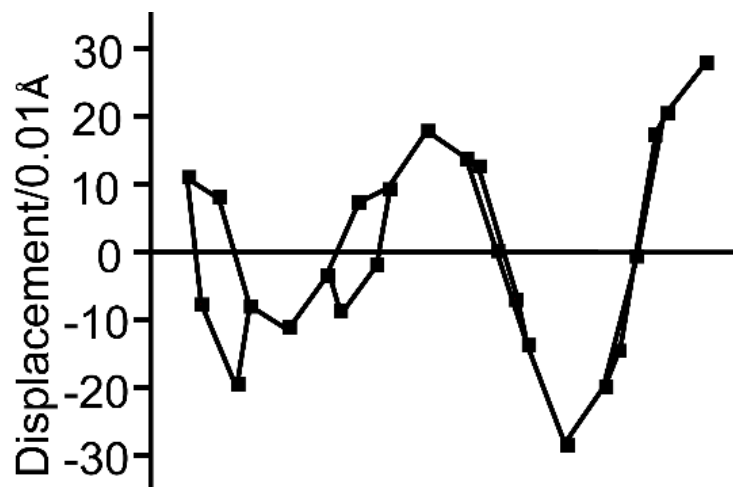

**Figure S8.** Atom deviations (in units of 0.01 Å) from the least-squares plane of the C<sub>20</sub>N<sub>4</sub> porphyrinato core in **2f**. The horizontal axis represents the atom number in the macrocycle showing the bond connectivity between atoms.

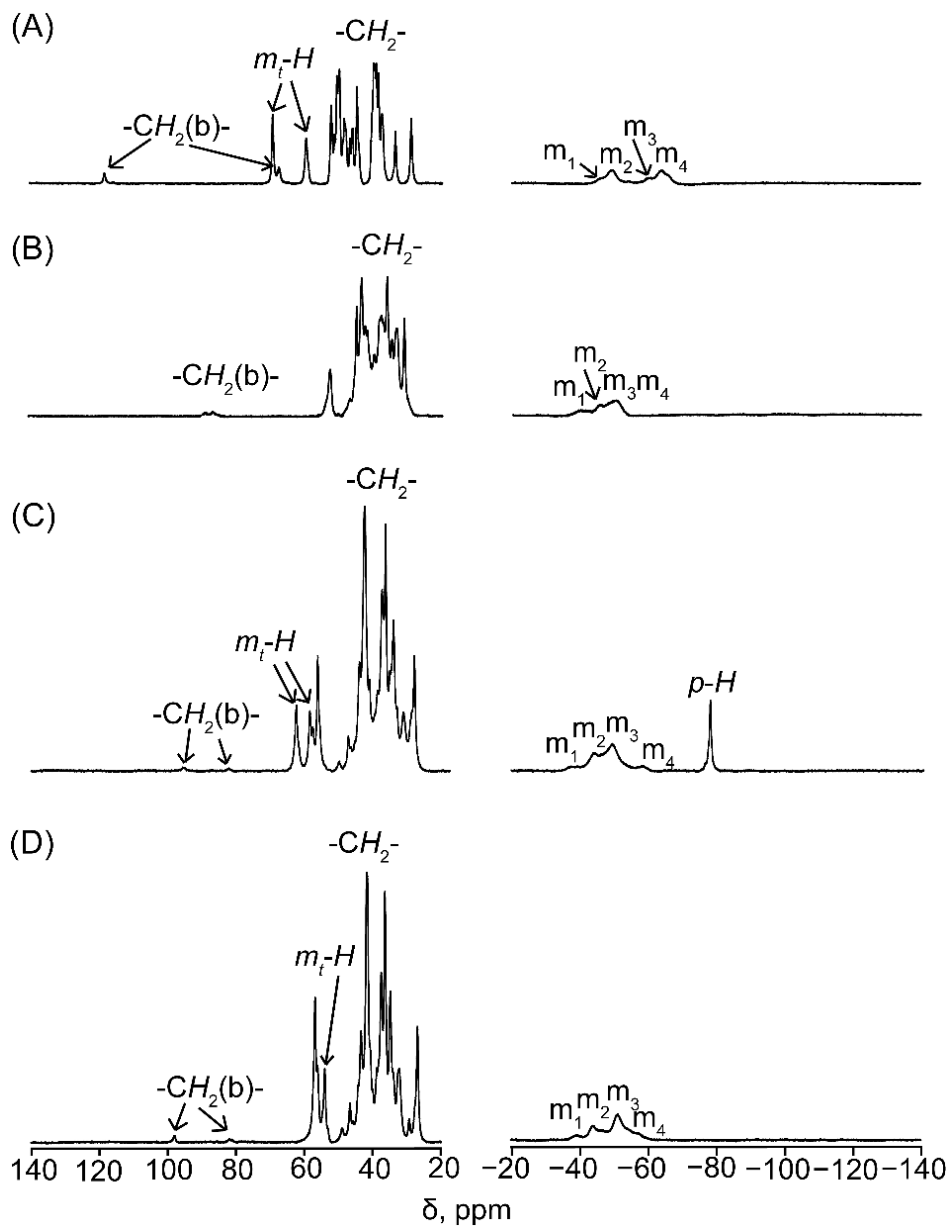

**Figure S9.**  $^1\text{H}$  NMR spectra (in  $\text{CDCl}_3$ , at 298 K) of (A) **2a**, (B) **2b**, (C) **2d** and, (D) **2e**.

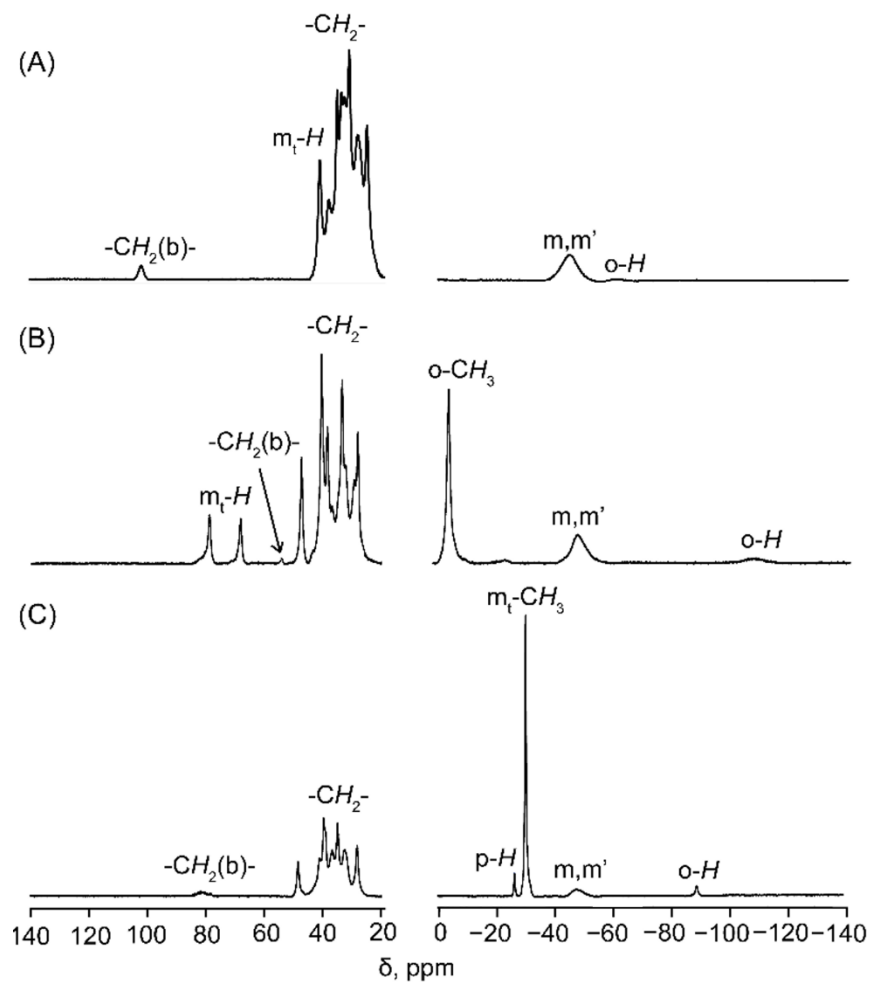

**Figure S10.**  $^1\text{H}$  NMR spectra (in  $\text{CDCl}_3$ , at 298 K) of (A) **2f**, (B) **2h**, and (C) **2i**.

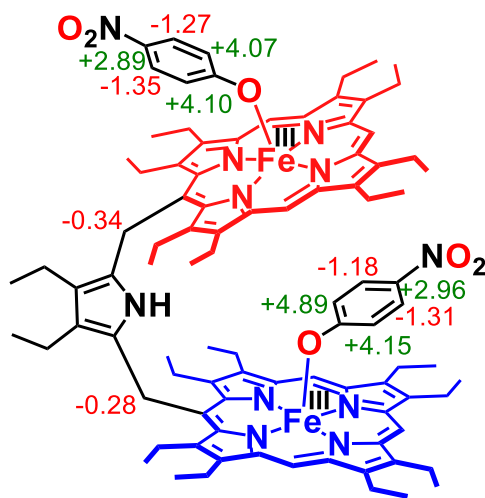

**Figure S11.** Calculated Mulliken spin densities ( $\times 10^{-2}$ ) for **2c** at the B97D/6-31G\*\*/LANL2DZ level of theory.

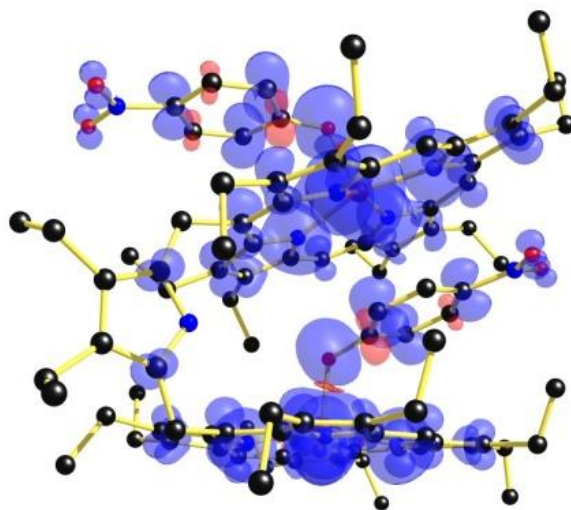

**Figure S12.** Mulliken spin density plot of **2c** at the B97D/6-31G\*\*/LANL2DZ level of theory (iso-value: 0.001).

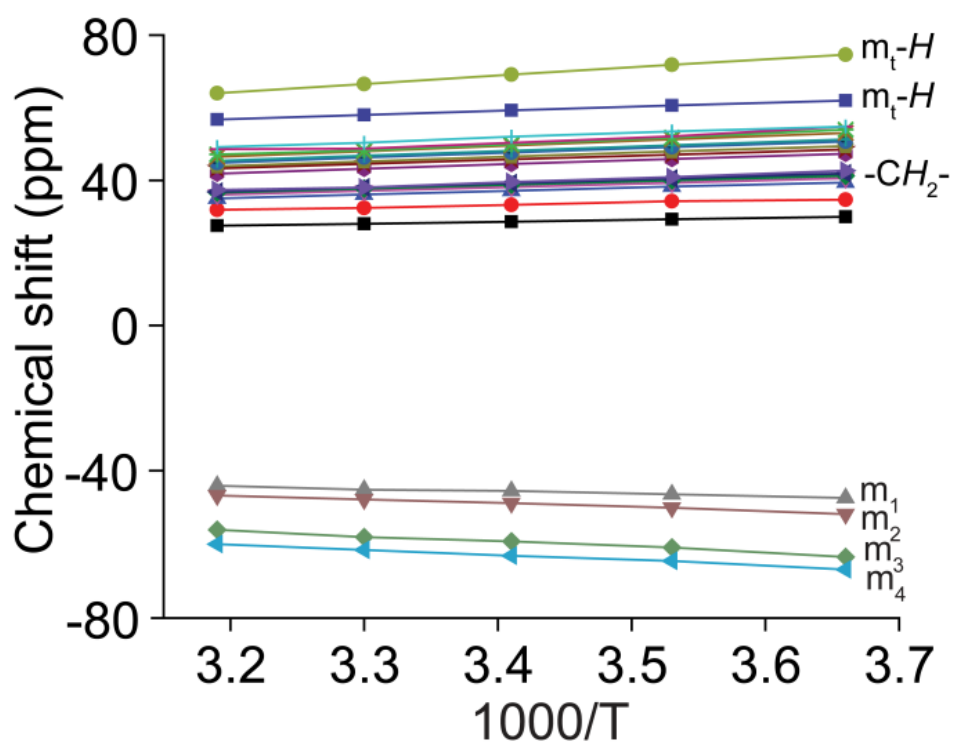

**Figure S13.** Curie plot (chemical shift vs.  $1/T$ ) of some proton signals of **2a**.

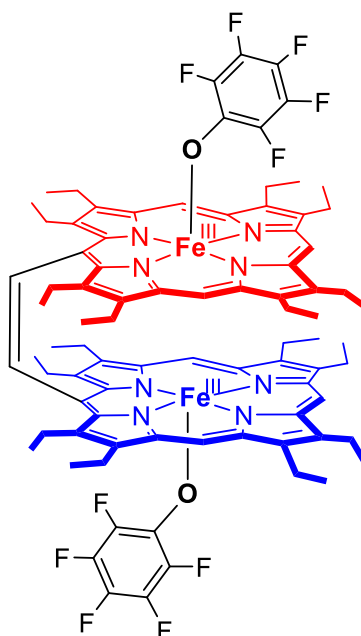

**Scheme S1:** Pentafluorophenolato analogue of *cis*-ethene bridged diiron(III) porphyrin dimer.

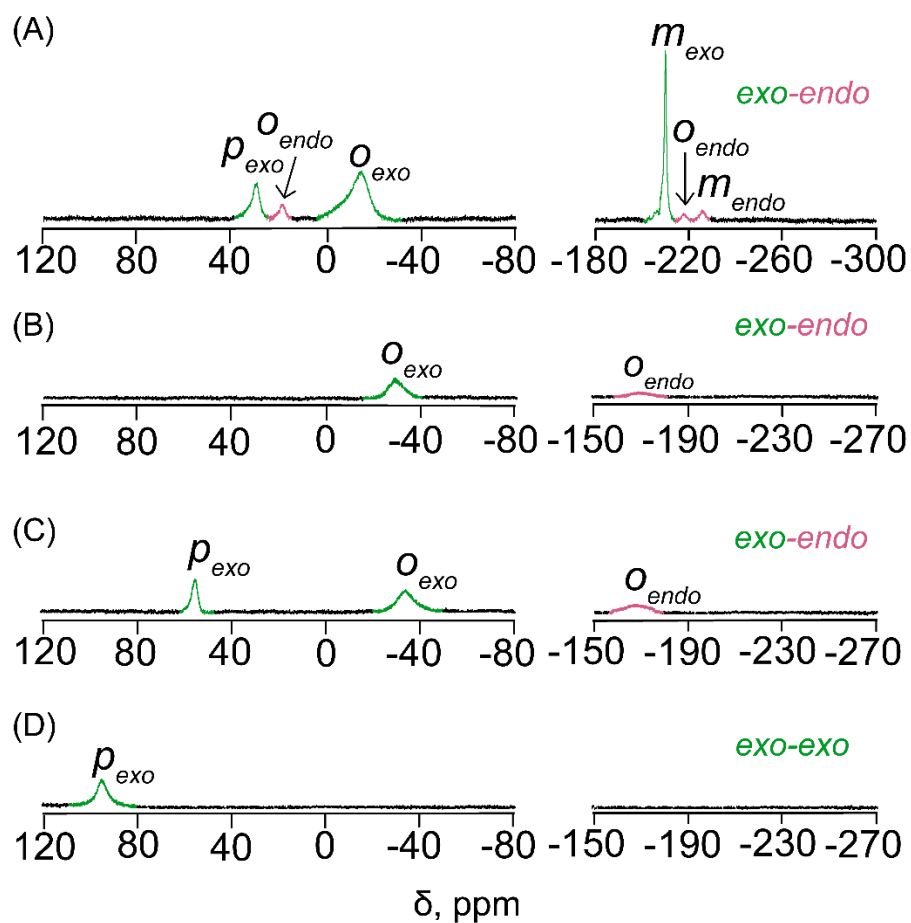

**Figure S14.**  $^{19}\text{F}$  NMR spectra (at 298 K) of (A) **2b** in  $\text{C}_6\text{D}_6$  and (B) **2d**, (C) **2e** and (D) **2h** in  $\text{CDCl}_3$ .



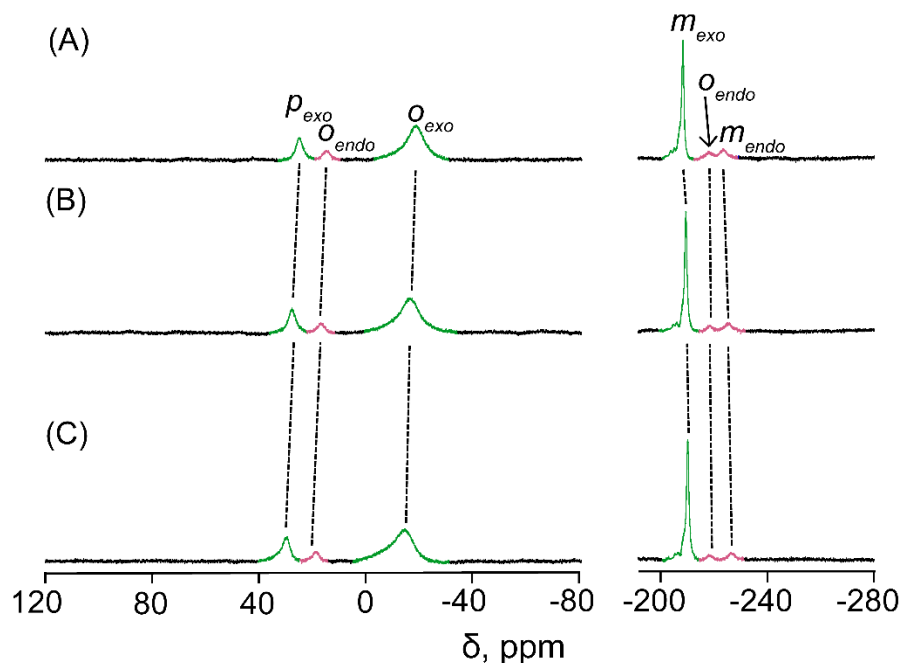

**Figure S15.** Variable temperature  $^{19}\text{F}$  NMR spectra of **2b** (in  $\text{C}_6\text{D}_6$ ) at (A) 323 K, (B) 313 K and (C) 298 K.

**Table S3.** Comparisons of Fe-F Bond Lengths, Fe-O-F Angles, and  $G$  factors for *exo-endo* dimer (**2b**)

| <i>Exo-endo</i>                                           | <i>o</i> -F (F <sub>1</sub> , F <sub>5</sub> ) | <i>m</i> -F (F <sub>2</sub> , F <sub>4</sub> ) | <i>p</i> -F(F <sub>3</sub> ) |
|-----------------------------------------------------------|------------------------------------------------|------------------------------------------------|------------------------------|
| <i>exo</i> -fluorophenol                                  |                                                |                                                |                              |
| $r(\text{Fe}_{exo}\text{-F})$ , Å                         | 3.80, 3.85                                     | 5.85, 5.88                                     | 6.66                         |
| $\theta(\text{O-Fe}_{exo}\text{-F})$ , <sup>a</sup> deg   | 46.4, 44.8                                     | 48.7, 47.4                                     | 47.2                         |
| $\phi$ , deg                                              | 171.6, 63.4                                    | 159.3, 93.3                                    | 126.4                        |
| $G_{axial}(\text{Fe}_{exo})$ , $10^{21}\text{cm}^{-3}$    | 7.77, 8.97 (8.37) <sup>b</sup>                 | 1.53, 1.84 (1.69) <sup>b</sup>                 | 1.30                         |
| $G_{rhombic}(\text{Fe}_{exo})$ , $10^{21}\text{cm}^{-3}$  | 7.36, 1.32 (4.34) <sup>c</sup>                 | 2.11, -2.64 (-0.27) <sup>c</sup>               | -0.54                        |
| $r(\text{Fe}_{endo}\text{-F})$ , Å                        | 8.0, 8.2                                       | 8.9, 9.1                                       | 9.4                          |
| $\theta(\text{O-Fe}_{endo}\text{-F})$ , <sup>a</sup> deg  | 29.5, 22.0                                     | 42.5, 37.5                                     | 44.9                         |
| $\phi$ , deg                                              | 87.6, 171.6                                    | 108.2, 156.2                                   | 132.7                        |
| $G_{axial}(\text{Fe}_{endo})$ , $10^{21}\text{cm}^{-3}$   | 2.50, 2.91 (2.71)                              | 0.89, 1.20 (1.05)                              | 0.61                         |
| $G_{rhombic}(\text{Fe}_{endo})$ , $10^{21}\text{cm}^{-3}$ | -0.47, 0.24 (-0.12)                            | -0.52, 0.33 (-0.10)                            | -0.05                        |
| $G_{axial}(\text{Fe}_{endo} + \text{Fe}_{exo})$           | 11.44                                          | 2.74                                           | 1.25                         |
| $G_{rhombic}(\text{Fe}_{endo} + \text{Fe}_{exo})$         | 1.91                                           | -0.37                                          | -0.59                        |

| <i>endo</i> -fluorophenol                                              |                |               |       |
|------------------------------------------------------------------------|----------------|---------------|-------|
| $r(\text{Fe}_{\text{endo}}\text{-F}), \text{\AA}$                      | 3.75, 3.79     | 5.89, 5.90    | 6.66  |
| $\theta(\text{O-Fe}_{\text{endo}}\text{-F}),^a \text{ deg}$            | 45.4, 44.7     | 46.5, 45.9    | 44.7  |
| $\phi, \text{ deg}$                                                    | 29.8, 97.2     | 0.4, 33.4     | 67.5  |
| $G_{\text{axial}}(\text{Fe}_{\text{endo}}), 10^{21}\text{cm}^{-3}$     | 9.08, 9.47     | 2.06, 2.20    | 1.75  |
| $G_{\text{rhombic}}(\text{Fe}_{\text{endo}}), 10^{21}\text{cm}^{-3}$   | 4.86, -8.80    | 2.57, 0.99    | -1.18 |
| $r(\text{Fe}_{\text{exo}}\text{-F}), \text{\AA}$                       | 4.5, 4.0       | 4.96, 4.46    | 4.95  |
| $\theta(\text{O-Fe}_{\text{exo}}\text{-F}),^a \text{ deg}$             | 137.6, 148.0   | 136.9, 144.8  | 140.1 |
| $\phi, \text{ deg}$                                                    | 88.4, 46.6     | 128.7, 23.6   | 79.5  |
| $G_{\text{axial}}(\text{Fe}_{\text{exo}}), 10^{21}\text{cm}^{-3}$      | 18.09, 6.98    | 4.91, 11.31   | 6.31  |
| $G_{\text{rhombic}}(\text{Fe}_{\text{exo}}), 10^{21}\text{cm}^{-3}$    | -0.24, -4.98   | -0.83, 2.54   | -3.17 |
| $G_{\text{axial}}(\text{Fe}_{\text{endo}} + \text{Fe}_{\text{exo}})$   | (27.17, 16.45) | (6.97, 13.51) | 8.06  |
| $G_{\text{rhombic}}(\text{Fe}_{\text{endo}} + \text{Fe}_{\text{exo}})$ | (4.62, -13.78) | (9.54, 14.5)  | -4.35 |

<sup>a</sup>Fe-O vector is treated as the z-axis. <sup>b</sup>averaged  $G_{\text{axial}}$  value and <sup>c</sup>averaged  $G_{\text{rhombic}}$  value due to assumption of allowable free rotation.

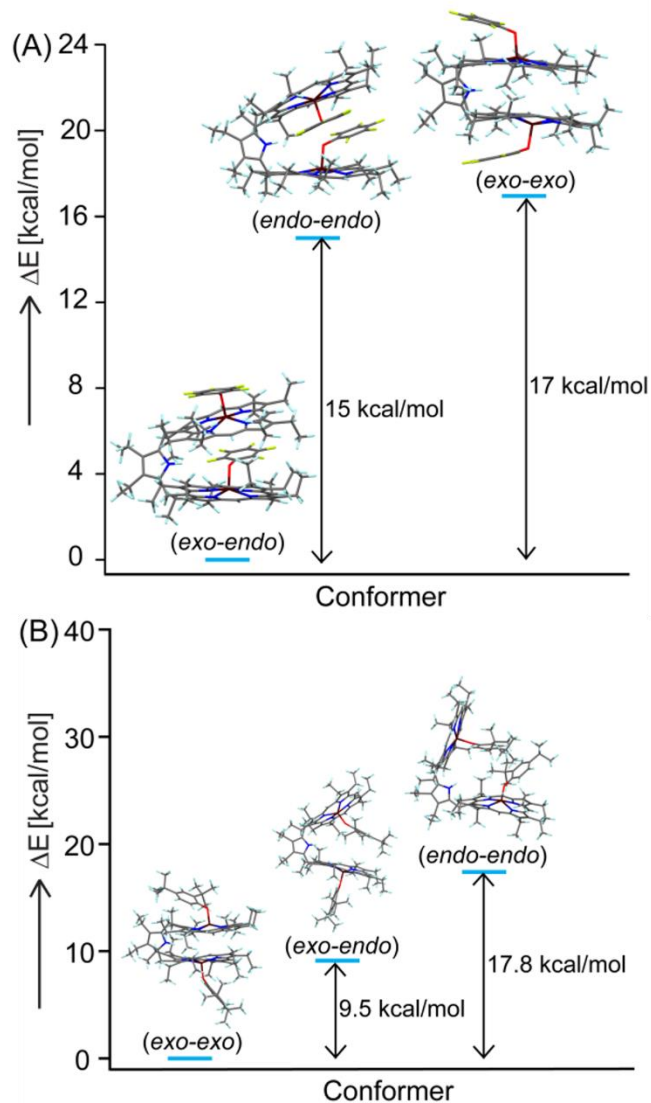

**Figure S16.** Relative energies of (A) **2b** and (B) **2f** as calculated using unrestricted B97D functional using LANL2DZ basis set for Fe and 6-31G\*\* for all other atoms in chloroform.

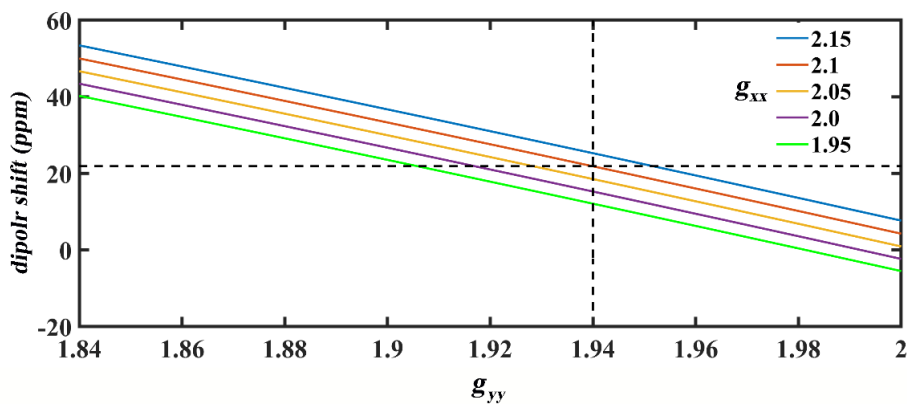

**Figure S17.** Correlation between metal-centered dipolar shifts and  $g_{yy}$  values across a range of  $g_{xx}$  values, varying from 1.95 to 2.15 with a 0.05 interval.

**2b (exo-endo):**

|    |              |              |              |   |              |              |              |   |              |              |              |
|----|--------------|--------------|--------------|---|--------------|--------------|--------------|---|--------------|--------------|--------------|
| 26 | 0.471216000  | 1.381764000  | -2.811090000 | 6 | 2.421901000  | -2.308801000 | -3.874171000 | 1 | -3.117787000 | -4.387531000 | -5.010821000 |
| 26 | -1.310026000 | -1.146198000 | 2.242212000  | 6 | 3.480487000  | -1.749702000 | -3.186560000 | 1 | -3.637190000 | -3.084484000 | -3.906067000 |
| 8  | -0.235602000 | 0.603870000  | -1.214683000 | 6 | 3.085211000  | -0.362614000 | -2.873551000 | 1 | -1.924691000 | -3.531384000 | -3.998127000 |
| 8  | -1.567638000 | -0.817572000 | 4.141657000  | 6 | 3.847767000  | 0.618704000  | -2.185106000 | 6 | 2.304594000  | -3.713399000 | -4.402260000 |
| 9  | -2.961915000 | 0.400260000  | -1.652525000 | 6 | 5.474115000  | 2.899741000  | -0.299606000 | 1 | 3.307708000  | -4.134358000 | -4.556235000 |
| 9  | -4.180431000 | -2.050383000 | -1.694494000 | 1 | 5.384952000  | 3.490393000  | 0.624433000  | 1 | 1.821200000  | -3.694376000 | -5.392260000 |
| 9  | -2.703719000 | -4.323918000 | -1.288356000 | 1 | 5.767088000  | 1.898959000  | 0.033712000  | 6 | 1.497805000  | -4.632298000 | -3.456798000 |
| 9  | -0.006650000 | -4.144405000 | -0.797736000 | 6 | 6.589499000  | 3.542624000  | -1.157618000 | 1 | 1.448653000  | -5.656877000 | -3.855565000 |
| 9  | 1.226058000  | -1.704951000 | -0.765946000 | 1 | 7.550990000  | 3.514919000  | -0.623708000 | 1 | 0.473599000  | -4.257268000 | -3.330586000 |
| 9  | -3.735198000 | 0.931228000  | 4.199143000  | 1 | 6.343207000  | 4.590938000  | -1.377673000 | 1 | 1.959717000  | -4.661561000 | -2.461388000 |
| 9  | -3.430516000 | 3.488337000  | 5.096752000  | 1 | 6.715131000  | 3.024778000  | -2.120822000 | 6 | 4.716153000  | -2.572579000 | -2.882885000 |
| 9  | -0.969753000 | 4.366220000  | 5.966128000  | 6 | 3.594409000  | 5.371050000  | -0.315817000 | 1 | 5.182647000  | -2.292388000 | -1.933248000 |
| 9  | 1.162650000  | 2.648525000  | 5.993062000  | 1 | 2.718427000  | 5.725599000  | 0.249000000  | 1 | 4.387628000  | -3.612672000 | -2.741638000 |
| 9  | 0.882421000  | 0.082587000  | 5.080297000  | 1 | 4.420589000  | 5.295086000  | 0.405192000  | 6 | 5.749720000  | -2.552764000 | -4.035066000 |
| 7  | 2.141813000  | 2.414366000  | -2.106160000 | 6 | 3.952721000  | 6.423647000  | -1.393631000 | 1 | 6.624487000  | -3.170291000 | -3.780387000 |
| 7  | -0.572824000 | 3.195957000  | -2.981473000 | 1 | 4.163452000  | 7.398438000  | -0.928566000 | 1 | 6.100511000  | -1.533058000 | -4.255430000 |
| 7  | -0.932414000 | 0.615312000  | -4.169568000 | 1 | 3.121872000  | 6.546871000  | -2.103462000 | 1 | 5.299147000  | -2.949170000 | -4.957313000 |
| 7  | 1.796815000  | -0.145063000 | -3.348108000 | 1 | 4.838101000  | 6.110132000  | -1.965337000 | 6 | 5.270137000  | 0.238989000  | -1.806704000 |
| 7  | 0.162122000  | -2.629626000 | 2.183562000  | 6 | -1.264842000 | 6.715592000  | -1.838884000 | 1 | 5.698293000  | -0.415435000 | -2.569798000 |
| 7  | -2.747964000 | -2.609498000 | 1.829241000  | 1 | -2.003327000 | 7.358897000  | -2.340788000 | 1 | 5.907313000  | 1.126436000  | -1.847111000 |
| 7  | -2.671734000 | 0.231424000  | 1.464684000  | 1 | -0.277295000 | 7.177240000  | -2.002107000 | 6 | 5.360470000  | -0.412935000 | -0.452217000 |
| 7  | 0.239191000  | 0.209426000  | 1.881553000  | 6 | -1.562802000 | 6.681613000  | -0.319716000 | 6 | 6.460210000  | -0.951168000 | 0.211448000  |
| 7  | 4.273103000  | -0.526779000 | 0.387168000  | 1 | -1.491471000 | 7.689401000  | 0.116500000  | 6 | 6.009592000  | -1.387883000 | 1.501680000  |
| 1  | 3.328812000  | -0.238133000 | 0.159056000  | 1 | -0.850191000 | 6.025165000  | 0.201617000  | 6 | 4.644946000  | -1.112438000 | 1.579617000  |
| 6  | 3.390357000  | 1.902313000  | -1.773475000 | 1 | -2.573473000 | 6.292703000  | -0.134332000 | 6 | 7.868547000  | -0.964217000 | -0.324157000 |
| 6  | 4.121421000  | 2.911484000  | -0.980432000 | 6 | -3.640209000 | 5.302628000  | -3.563689000 | 1 | 8.466294000  | -1.709316000 | 0.220996000  |
| 6  | 3.300561000  | 4.023229000  | -0.916013000 | 1 | -3.885051000 | 4.993981000  | -4.592733000 | 1 | 7.863804000  | -1.276840000 | -1.382607000 |
| 6  | 2.080299000  | 3.696602000  | -1.607813000 | 1 | -3.589168000 | 6.402177000  | -3.565925000 | 6 | 8.555635000  | 0.416888000  | -0.212279000 |
| 6  | 1.003200000  | 4.586238000  | -1.721924000 | 6 | -4.772314000 | 4.845921000  | -2.613129000 | 1 | 9.588152000  | 0.382313000  | -0.594413000 |
| 1  | 1.143094000  | 5.566395000  | -1.271091000 | 1 | -5.746951000 | 5.226046000  | -2.954527000 | 1 | 8.583115000  | 0.748178000  | 0.837057000  |
| 6  | -0.220543000 | 4.368000000  | -2.352033000 | 1 | -4.588691000 | 5.214202000  | -1.594915000 | 1 | 8.001696000  | 1.172416000  | -0.787180000 |
| 6  | -1.290644000 | 5.346312000  | -2.456333000 | 1 | -4.819665000 | 3.748089000  | -2.568149000 | 6 | 6.854644000  | -2.039367000 | 2.566252000  |
| 6  | -2.300206000 | 4.742179000  | -3.178261000 | 6 | -4.446410000 | 0.311307000  | -5.477903000 | 1 | 6.303035000  | -2.048007000 | 3.519697000  |
| 6  | -1.838517000 | 3.398245000  | -3.489129000 | 1 | -4.742341000 | -0.451878000 | -6.213389000 | 1 | 7.761858000  | -1.435483000 | 2.738918000  |
| 6  | -2.580480000 | 2.441038000  | -4.186956000 | 1 | -4.593875000 | 1.292299000  | -5.958345000 | 6 | 7.285521000  | -3.483397000 | 2.212987000  |
| 1  | -3.577649000 | 2.730351000  | -4.514132000 | 6 | -5.352241000 | 0.211530000  | -4.227219000 | 1 | 7.933432000  | -3.903428000 | 2.998217000  |
| 6  | -2.172423000 | 1.136760000  | -4.476024000 | 1 | -6.410544000 | 0.354630000  | -4.493409000 | 1 | 7.838374000  | -3.503947000 | 1.262501000  |
| 6  | -3.00832000  | 0.129466000  | -5.116227000 | 1 | -5.066239000 | 0.972308000  | -3.490527000 | 1 | 6.409772000  | -4.137856000 | 2.100754000  |
| 6  | -2.235982000 | -1.016778000 | -5.198581000 | 1 | -5.234780000 | -0.767539000 | -3.743713000 | 6 | 1.539893000  | -2.475460000 | 2.161362000  |
| 6  | -0.947559000 | -0.688390000 | -4.616819000 | 6 | -2.625792000 | -2.372063000 | -5.718925000 | 6 | 2.168780000  | -3.800335000 | 2.056240000  |
| 6  | 0.132231000  | -1.562107000 | -4.523714000 | 1 | -1.842525000 | -2.744260000 | -6.400280000 | 6 | 1.144690000  | -4.726731000 | 2.132427000  |
| 1  | -0.015908000 | -2.556282000 | -4.939893000 | 1 | -3.546635000 | -2.281699000 | -6.314206000 | 6 | -0.089770000 | -3.985480000 | 2.192407000  |
| 6  | 1.384891000  | -1.314002000 | -3.949783000 | 6 | -2.842082000 | -3.409034000 | -4.589729000 | 6 | -1.349839000 | -4.592063000 | 2.173887000  |

|   |              |              |              |   |              |              |              |   |              |              |              |
|---|--------------|--------------|--------------|---|--------------|--------------|--------------|---|--------------|--------------|--------------|
| 1 | -1.364914000 | -5.678370000 | 2.236755000  | 1 | 1.771104000  | -6.386643000 | -0.063897000 | 6 | 1.339636000  | 3.793143000  | 1.868446000  |
| 6 | -2.580048000 | -3.968847000 | 1.974643000  | 1 | 0.026692000  | -6.475716000 | 0.242804000  | 1 | 0.856434000  | 4.147366000  | 0.944760000  |
| 6 | -3.842632000 | -4.660348000 | 1.798705000  | 6 | -4.027015000 | -6.151141000 | 1.831223000  | 1 | 2.390409000  | 4.098696000  | 1.799957000  |
| 6 | -4.780328000 | -3.689723000 | 1.509617000  | 1 | -5.080256000 | -6.383660000 | 2.049211000  | 6 | 0.688561000  | 4.498782000  | 3.080838000  |
| 6 | -4.084058000 | -2.418254000 | 1.545995000  | 1 | -3.431715000 | -6.580708000 | 2.652981000  | 1 | 0.782023000  | 5.591167000  | 2.982470000  |
| 6 | -4.677078000 | -1.178892000 | 1.292818000  | 6 | -3.616349000 | -6.822958000 | 0.498233000  | 1 | 1.165069000  | 4.191801000  | 4.020295000  |
| 1 | -5.743768000 | -1.179257000 | 1.079611000  | 1 | -3.739978000 | -7.914913000 | 0.559180000  | 1 | -0.378511000 | 4.249100000  | 3.151620000  |
| 6 | -4.021443000 | 0.049973000  | 1.246161000  | 1 | -2.567428000 | -6.598431000 | 0.259874000  | 6 | 3.630727000  | 1.814717000  | 2.589981000  |
| 6 | -4.659521000 | 1.317390000  | 0.946237000  | 1 | -4.233218000 | -6.442831000 | -0.328445000 | 1 | 3.847884000  | 2.740381000  | 2.039922000  |
| 6 | -3.666456000 | 2.272250000  | 0.969249000  | 6 | -6.246257000 | -3.862703000 | 1.231430000  | 1 | 4.405722000  | 1.112828000  | 2.275283000  |
| 6 | -2.437214000 | 1.575209000  | 1.290442000  | 1 | -6.530971000 | -3.236161000 | 0.370257000  | 6 | 3.751445000  | 2.104908000  | 4.104781000  |
| 6 | -1.191631000 | 2.178980000  | 1.419105000  | 1 | -6.442077000 | -4.906243000 | 0.942921000  | 1 | 4.791188000  | 2.350684000  | 4.370072000  |
| 1 | -1.156270000 | 3.253240000  | 1.258815000  | 6 | -7.122686000 | -3.489855000 | 2.451583000  | 1 | 3.427648000  | 1.241367000  | 4.703296000  |
| 6 | 0.023883000  | 1.559020000  | 1.719903000  | 1 | -8.191699000 | -3.609386000 | 2.218418000  | 1 | 3.106737000  | 2.948038000  | 4.383977000  |
| 6 | 1.244957000  | 2.293128000  | 1.921708000  | 1 | -6.943891000 | -2.446953000 | 2.751590000  | 6 | 3.670785000  | -1.262222000 | 2.720235000  |
| 6 | 2.234566000  | 1.371582000  | 2.214669000  | 1 | -6.876700000 | -4.133499000 | 3.309175000  | 1 | 3.832777000  | -0.472115000 | 3.465499000  |
| 6 | 1.590487000  | 0.044535000  | 2.164600000  | 6 | -6.102938000 | 1.485264000  | 0.570255000  | 1 | 3.874015000  | -2.186359000 | 3.269961000  |
| 6 | 2.200230000  | -1.226180000 | 2.315905000  | 1 | -6.427041000 | 2.514507000  | 0.786161000  | 6 | -0.832228000 | -0.574871000 | -1.195109000 |
| 6 | 3.564872000  | -4.181746000 | 1.627350000  | 1 | -6.731158000 | 0.819445000  | 1.182952000  | 6 | -2.224792000 | -0.707056000 | -1.433291000 |
| 1 | 3.724043000  | -5.244795000 | 1.861640000  | 6 | -6.324605000 | 1.173293000  | -0.929177000 | 6 | -2.850454000 | -1.951804000 | -1.454309000 |
| 1 | 4.354173000  | -3.632217000 | 2.144547000  | 1 | -7.392817000 | 1.214096000  | -1.191726000 | 6 | -2.101562000 | -3.117088000 | -1.246778000 |
| 6 | 3.750267000  | -3.973627000 | 0.105232000  | 1 | -5.931617000 | 0.178211000  | -1.177355000 | 6 | -0.727729000 | -3.021434000 | -0.999919000 |
| 1 | 4.771398000  | -4.248890000 | -0.196388000 | 1 | -5.784880000 | 1.905021000  | -1.546602000 | 6 | -0.105453000 | -1.770497000 | -0.976401000 |
| 1 | 3.581856000  | -2.926901000 | -0.169736000 | 6 | -3.787051000 | 3.750278000  | 0.742250000  | 6 | -1.436014000 | 0.417118000  | 4.606118000  |
| 1 | 3.033779000  | -4.590679000 | -0.455321000 | 1 | -4.761351000 | 3.963406000  | 0.280163000  | 6 | -2.521388000 | 1.331471000  | 4.630912000  |
| 6 | 1.234210000  | -6.227057000 | 2.053068000  | 1 | -3.020232000 | 4.076578000  | 0.021756000  | 6 | -2.376123000 | 2.642871000  | 5.096873000  |
| 1 | 0.486455000  | -6.670771000 | 2.729837000  | 6 | -3.651689000 | 4.566286000  | 2.048975000  | 6 | -1.130173000 | 3.090261000  | 5.555099000  |
| 1 | 2.215652000  | -6.559668000 | 2.421696000  | 1 | -3.773804000 | 5.641864000  | 1.850422000  | 6 | -0.040199000 | 2.208831000  | 5.557800000  |
| 6 | 1.010288000  | -6.779124000 | 0.624974000  | 1 | -2.667159000 | 4.411254000  | 2.511523000  | 6 | -0.190381000 | 0.903853000  | 5.083190000  |
| 1 | 1.068877000  | -7.878215000 | 0.622422000  | 1 | -4.409541000 | 4.252452000  | 2.779323000  |   |              |              |              |

**2b (exo-exo):**

|    |              |              |              |   |              |              |             |   |             |              |              |
|----|--------------|--------------|--------------|---|--------------|--------------|-------------|---|-------------|--------------|--------------|
| 26 | 3.443314000  | 0.836621000  | 0.636224000  | 6 | 1.182916000  | -1.019701000 | 1.700447000 | 6 | 1.824950000 | 4.780165000  | 1.549443000  |
| 26 | -3.159941000 | 1.430418000  | -0.882191000 | 6 | 4.674201000  | -0.835372000 | 2.547026000 | 6 | 3.045175000 | 5.165670000  | 1.029223000  |
| 8  | 4.580217000  | 0.435601000  | 2.176978000  | 6 | 0.011416000  | -0.951217000 | 2.595322000 | 6 | 3.699365000 | 3.950751000  | 0.573763000  |
| 7  | 1.578826000  | 0.270858000  | 1.377416000  | 6 | 5.584479000  | -1.727372000 | 1.920916000 | 6 | 4.876825000 | 3.907124000  | -0.178852000 |
| 7  | 2.924656000  | 2.848778000  | 0.868048000  | 6 | -0.230648000 | 0.391798000  | 2.810071000 | 1 | 5.403539000 | 4.847200000  | -0.333088000 |
| 7  | 4.791013000  | 1.530294000  | -0.807573000 | 6 | 5.584020000  | -3.098243000 | 2.189700000 | 6 | 5.358287000 | 2.786253000  | -0.863504000 |
| 7  | 3.463902000  | -1.046142000 | -0.265133000 | 6 | 0.729716000  | 1.132952000  | 2.036378000 | 6 | 6.463712000 | 2.800367000  | -1.806996000 |
| 7  | -3.859678000 | -0.260462000 | 0.128743000  | 6 | 4.691241000  | -3.626656000 | 3.133385000 | 6 | 6.539123000 | 1.529984000  | -2.341375000 |
| 7  | -4.121596000 | 2.647904000  | 0.540129000  | 6 | 0.784892000  | 2.531584000  | 2.018426000 | 6 | 5.497196000 | 0.750420000  | -1.696189000 |
| 7  | -1.857186000 | 3.056306000  | -1.150604000 | 1 | -0.017840000 | 3.051117000  | 2.535485000 | 6 | 5.270096000 | -0.606813000 | -1.906686000 |
| 7  | -1.696807000 | 0.164425000  | -1.681842000 | 6 | 3.824365000  | -2.765912000 | 3.816922000 | 1 | 5.909247000 | -1.093377000 | -2.640185000 |
| 7  | -0.490354000 | -3.385748000 | 0.146270000  | 6 | 3.814416000  | -1.397341000 | 3.526510000 | 6 | 4.362903000 | -1.433293000 | -1.234452000 |
| 1  | -0.377838000 | -2.389153000 | 0.006532000  | 6 | 1.785157000  | 3.332013000  | 1.471647000 | 6 | 4.296408000 | -2.854549000 | -1.430879000 |

|   |              |              |              |   |              |              |              |   |              |              |              |
|---|--------------|--------------|--------------|---|--------------|--------------|--------------|---|--------------|--------------|--------------|
| 6 | 3.376645000  | -3.359114000 | -0.525946000 | 1 | 9.229803000  | 0.923268000  | -1.934381000 | 1 | 0.484136000  | 2.126348000  | -3.419483000 |
| 6 | 2.836957000  | -2.197298000 | 0.197020000  | 6 | 5.163387000  | -3.625798000 | -2.387804000 | 6 | -0.724488000 | 0.622759000  | -2.543566000 |
| 6 | 1.843497000  | -2.180973000 | 1.213464000  | 1 | 5.277808000  | -3.057653000 | -3.324347000 | 6 | -0.118075000 | -0.475569000 | -3.245516000 |
| 6 | -0.867482000 | -2.004747000 | 3.238893000  | 1 | 4.673844000  | -4.572436000 | -2.655240000 | 6 | -0.705776000 | -1.635286000 | -2.781663000 |
| 1 | -1.891926000 | -1.602150000 | 3.266808000  | 6 | 6.558780000  | -3.916880000 | -1.784321000 | 6 | -1.735465000 | -1.217177000 | -1.809732000 |
| 1 | -0.934273000 | -2.918811000 | 2.642373000  | 1 | 7.200726000  | -4.434479000 | -2.513159000 | 6 | -2.643059000 | -2.043694000 | -1.094262000 |
| 6 | -0.435488000 | -2.336139000 | 4.687990000  | 1 | 6.462554000  | -4.542693000 | -0.887606000 | 6 | -4.542506000 | -3.924566000 | 0.965136000  |
| 1 | -1.071545000 | -3.130448000 | 5.107744000  | 1 | 7.048537000  | -2.980500000 | -1.480483000 | 1 | -3.585486000 | -4.438683000 | 0.828964000  |
| 1 | -0.524129000 | -1.444960000 | 5.326768000  | 6 | 3.072329000  | -4.844490000 | -0.515423000 | 1 | -4.805002000 | -4.075066000 | 2.023593000  |
| 1 | 0.611225000  | -2.662872000 | 4.733089000  | 1 | 2.698653000  | -5.214304000 | 0.440665000  | 6 | -5.656005000 | -4.574464000 | 0.106410000  |
| 6 | -1.256758000 | 1.015945000  | 3.716046000  | 1 | 4.023685000  | -5.370629000 | -0.690373000 | 1 | -5.762706000 | -5.641024000 | 0.355916000  |
| 1 | -1.640683000 | 0.257948000  | 4.412236000  | 6 | 2.068015000  | -5.249362000 | -1.618787000 | 1 | -5.454707000 | -4.491761000 | -0.970250000 |
| 1 | -0.763009000 | 1.785393000  | 4.332475000  | 1 | 1.947568000  | -6.343108000 | -1.639068000 | 1 | -6.617062000 | -4.071041000 | 0.287199000  |
| 6 | -2.429435000 | 1.640678000  | 2.939651000  | 1 | 2.417574000  | -4.915196000 | -2.606973000 | 6 | -6.254259000 | -1.904497000 | 2.503536000  |
| 1 | -3.179344000 | 2.068645000  | 3.620680000  | 1 | 1.087799000  | -4.803802000 | -1.423882000 | 1 | -6.626478000 | -2.927220000 | 2.351877000  |
| 1 | -2.915704000 | 0.880172000  | 2.320777000  | 6 | 1.397836000  | -3.518688000 | 1.785267000  | 1 | -7.129216000 | -1.240941000 | 2.423436000  |
| 1 | -2.087494000 | 2.433601000  | 2.262930000  | 1 | 2.254518000  | -4.196489000 | 1.853088000  | 6 | -5.635639000 | -1.780356000 | 3.917160000  |
| 6 | 0.740854000  | 5.641046000  | 2.133984000  | 1 | 1.098368000  | -3.376862000 | 2.827993000  | 1 | -6.374754000 | -2.023335000 | 4.695450000  |
| 1 | -0.238446000 | 5.275144000  | 1.785972000  | 6 | 0.292434000  | -4.146995000 | 0.983694000  | 1 | -5.269715000 | -0.756823000 | 4.086885000  |
| 1 | 0.849891000  | 6.667824000  | 1.754427000  | 6 | -0.190073000 | -5.451975000 | 0.933876000  | 1 | -4.779767000 | -2.464449000 | 4.020639000  |
| 6 | 0.764716000  | 5.659631000  | 3.681637000  | 6 | 0.342863000  | -6.607712000 | 1.735532000  | 6 | -6.786043000 | 3.287029000  | 3.124570000  |
| 1 | -0.048726000 | 6.287528000  | 4.075907000  | 1 | 0.150681000  | -7.551953000 | 1.201635000  | 1 | -7.578076000 | 2.607105000  | 2.772392000  |
| 1 | 1.723121000  | 6.057733000  | 4.046375000  | 1 | 1.438235000  | -6.518432000 | 1.834623000  | 1 | -7.249142000 | 4.277395000  | 3.247785000  |
| 1 | 0.646902000  | 4.643182000  | 4.084586000  | 6 | -0.283893000 | -6.678227000 | 3.148231000  | 6 | -6.254861000 | 2.791502000  | 4.492029000  |
| 6 | 3.587421000  | 6.559888000  | 0.877099000  | 1 | 0.113420000  | -7.530366000 | 3.722019000  | 1 | -7.068962000 | 2.724957000  | 5.229485000  |
| 1 | 4.664538000  | 6.563178000  | 1.109225000  | 1 | -1.377265000 | -6.784236000 | 3.077017000  | 1 | -5.488513000 | 3.480561000  | 4.877105000  |
| 1 | 3.102770000  | 7.215798000  | 1.615820000  | 1 | -0.072202000 | -5.754197000 | 3.707827000  | 1 | -5.793879000 | 1.798267000  | 4.388883000  |
| 6 | 3.372790000  | 7.141431000  | -0.541100000 | 6 | -3.579312000 | -1.601763000 | -0.120590000 | 6 | -5.074366000 | 5.888395000  | 2.205913000  |
| 1 | 3.784040000  | 8.159788000  | -0.609531000 | 6 | -4.434525000 | -2.432094000 | 0.739024000  | 1 | -4.078661000 | 6.304278000  | 2.432188000  |
| 1 | 2.300352000  | 7.181014000  | -0.780190000 | 6 | -5.250187000 | -1.561204000 | 1.437924000  | 1 | -5.648756000 | 5.912110000  | 3.144037000  |
| 1 | 3.862057000  | 6.513187000  | -1.298398000 | 6 | -4.886779000 | -0.227108000 | 1.051544000  | 6 | -5.770110000 | 6.779885000  | 1.148667000  |
| 6 | 7.355085000  | 3.979140000  | -2.074760000 | 6 | -5.505633000 | 0.914369000  | 1.573144000  | 1 | -5.852017000 | 7.818206000  | 1.504176000  |
| 1 | 6.747519000  | 4.894638000  | -2.164576000 | 1 | -6.322565000 | 0.741056000  | 2.270381000  | 1 | -6.780650000 | 6.401604000  | 0.934619000  |
| 1 | 7.865546000  | 3.840303000  | -3.039853000 | 6 | -5.147426000 | 2.242382000  | 1.363395000  | 1 | -5.202213000 | 6.776053000  | 0.206592000  |
| 6 | 8.408664000  | 4.175748000  | -0.957623000 | 6 | -5.693031000 | 3.370160000  | 2.096892000  | 6 | -0.833721000 | 6.680934000  | -1.055280000 |
| 1 | 9.045180000  | 5.048182000  | -1.169318000 | 6 | -4.934334000 | 4.466102000  | 1.742422000  | 1 | -0.943462000 | 6.898558000  | 0.018759000  |
| 1 | 9.049448000  | 3.285549000  | -0.874611000 | 6 | -3.956746000 | 3.995330000  | 0.776568000  | 6 | -1.876614000 | 7.498119000  | -1.855458000 |
| 1 | 7.916090000  | 4.328610000  | 0.013968000  | 6 | -2.951404000 | 4.786012000  | 0.213915000  | 1 | -1.760698000 | 8.575599000  | -1.663315000 |
| 6 | 7.538613000  | 0.987653000  | -3.322288000 | 1 | -2.926426000 | 5.835912000  | 0.499991000  | 1 | -2.898125000 | 7.200715000  | -1.576034000 |
| 1 | 7.949358000  | 1.813336000  | -3.923127000 | 6 | -1.974610000 | 4.349390000  | -0.684000000 | 1 | -1.756405000 | 7.319197000  | -2.934097000 |
| 1 | 7.039030000  | 0.300203000  | -4.023763000 | 6 | -0.968449000 | 5.203531000  | -1.291166000 | 6 | 0.890496000  | 4.788032000  | -3.061980000 |
| 6 | 8.695951000  | 0.242026000  | -2.613137000 | 6 | -0.255597000 | 4.409010000  | -2.166351000 | 1 | 0.706318000  | 4.396440000  | -4.076149000 |
| 1 | 9.413220000  | -0.156524000 | -3.346502000 | 6 | -0.807057000 | 3.072845000  | -2.043280000 | 1 | 0.933073000  | 5.884046000  | -3.149508000 |
| 1 | 8.306219000  | -0.593868000 | -2.013574000 | 6 | -0.324858000 | 1.952280000  | -2.713848000 | 6 | 2.248061000  | 4.260541000  | -2.542391000 |

|   |              |              |              |   |              |              |              |   |              |              |              |
|---|--------------|--------------|--------------|---|--------------|--------------|--------------|---|--------------|--------------|--------------|
| 1 | 3.069958000  | 4.578362000  | -3.201920000 | 1 | -2.064534000 | -3.472392000 | -4.462013000 | 6 | -4.414300000 | -0.747509000 | -3.554049000 |
| 1 | 2.253804000  | 3.164012000  | -2.483015000 | 6 | -2.520850000 | -3.543089000 | -1.332238000 | 6 | -4.953625000 | -2.032028000 | -3.695627000 |
| 1 | 2.438814000  | 4.646111000  | -1.536093000 | 1 | -3.476442000 | -4.041362000 | -1.165705000 | 6 | -6.071427000 | -2.417040000 | -2.945707000 |
| 6 | 0.991638000  | -0.361242000 | -4.255368000 | 1 | -2.316071000 | -3.725878000 | -2.391124000 | 6 | -6.663343000 | -1.495925000 | -2.069742000 |
| 1 | 0.893587000  | -1.167380000 | -4.996966000 | 6 | -1.476258000 | -4.154607000 | -0.432202000 | 6 | -6.143032000 | -0.203958000 | -1.965909000 |
| 1 | 0.894324000  | 0.583282000  | -4.811545000 | 6 | -1.313767000 | -5.456846000 | 0.042810000  | 9 | -6.564240000 | -3.671309000 | -3.053519000 |
| 6 | 2.385827000  | -0.442588000 | -3.596271000 | 6 | -2.135733000 | -6.644463000 | -0.378031000 | 9 | -7.729201000 | -1.867516000 | -1.327807000 |
| 1 | 3.184519000  | -0.345194000 | -4.347274000 | 1 | -2.143263000 | -7.394313000 | 0.428835000  | 9 | -4.389661000 | -2.922579000 | -4.543860000 |
| 1 | 2.509570000  | -1.405422000 | -3.083825000 | 1 | -3.183063000 | -6.334355000 | -0.532229000 | 9 | -3.313042000 | -0.424392000 | -4.264180000 |
| 1 | 2.518944000  | 0.346024000  | -2.843298000 | 6 | -1.604562000 | -7.293454000 | -1.677666000 | 9 | -6.740348000 | 0.670510000  | -1.128570000 |
| 6 | -0.249462000 | -2.975919000 | -3.318459000 | 1 | -2.218649000 | -8.157892000 | -1.976025000 | 9 | 4.650179000  | -4.956512000 | 3.364250000  |
| 1 | -0.318982000 | -3.774002000 | -2.576011000 | 1 | -0.567010000 | -7.633598000 | -1.539321000 | 9 | 6.430309000  | -3.925840000 | 1.539927000  |
| 1 | 0.823346000  | -2.888774000 | -3.543715000 | 1 | -1.609986000 | -6.561882000 | -2.500281000 | 9 | 6.432082000  | -1.249316000 | 0.984590000  |
| 6 | -0.982926000 | -3.379200000 | -4.618904000 | 1 | 0.178883000  | 7.002445000  | -1.340373000 | 9 | 2.915894000  | -0.607408000 | 4.150611000  |
| 1 | -0.597846000 | -4.339287000 | -4.995331000 | 8 | -4.387911000 | 1.368498000  | -2.404985000 | 9 | 2.953329000  | -3.283677000 | 4.714180000  |
| 1 | -0.832070000 | -2.613262000 | -5.393901000 | 6 | -4.967028000 | 0.197458000  | -2.652708000 |   |              |              |              |

## 2b (endo-endo):

|    |              |              |              |   |              |              |              |   |              |              |              |
|----|--------------|--------------|--------------|---|--------------|--------------|--------------|---|--------------|--------------|--------------|
| 26 | -0.584024000 | 2.092721000  | -1.828381000 | 6 | -3.577459000 | 1.239063000  | -1.678418000 | 6 | -5.979797000 | 0.900169000  | -0.438374000 |
| 8  | -0.384693000 | 1.527911000  | 0.005984000  | 6 | -4.678405000 | -1.959398000 | -1.269253000 | 1 | -6.160510000 | 1.227725000  | 0.596404000  |
| 7  | -0.410087000 | 4.181657000  | -1.605871000 | 6 | 3.324398000  | 1.531004000  | -3.670672000 | 1 | -5.781153000 | -0.172859000 | -0.371679000 |
| 7  | -0.952628000 | 0.316447000  | -2.852276000 | 6 | 2.015614000  | 4.424689000  | -1.944391000 | 6 | -7.076341000 | -2.781013000 | -1.711264000 |
| 7  | -2.673777000 | 2.292243000  | -1.718803000 | 1 | 2.862001000  | 5.101689000  | -1.842775000 | 1 | -7.332976000 | -1.767610000 | -2.062205000 |
| 7  | -3.681798000 | -2.242617000 | -0.358398000 | 6 | -2.341888000 | 1.543428000  | 1.384293000  | 1 | -7.894323000 | -3.102422000 | -1.047583000 |
| 1  | -2.771555000 | -1.798350000 | -0.339452000 | 6 | 0.019162000  | -0.413908000 | -3.499150000 | 6 | 4.860297000  | 4.606787000  | -4.217399000 |
| 7  | 1.317491000  | 2.193308000  | -2.699375000 | 6 | -2.883038000 | 3.543864000  | 2.644019000  | 1 | 4.009909000  | 5.302572000  | -4.157158000 |
| 6  | -1.383288000 | 5.003184000  | -1.083697000 | 6 | -0.486276000 | -1.714883000 | -3.852186000 | 1 | 4.811328000  | 4.098036000  | -5.191657000 |
| 6  | -4.586776000 | 2.996438000  | -0.620357000 | 6 | 1.330499000  | -0.008164000 | -3.770083000 | 1 | 5.792566000  | 5.190271000  | -4.173826000 |
| 6  | -0.746329000 | 3.344129000  | 1.522817000  | 1 | 1.953512000  | -0.721779000 | -4.303377000 | 6 | 4.800597000  | 3.575410000  | -3.066460000 |
| 6  | -0.820608000 | 6.283170000  | -0.693376000 | 6 | -4.522887000 | -0.975663000 | -2.396795000 | 1 | 5.662346000  | 2.895580000  | -3.129747000 |
| 6  | -4.778757000 | 1.666927000  | -0.942613000 | 1 | -5.447008000 | -0.394008000 | -2.482717000 | 1 | 4.886110000  | 4.094147000  | -2.099820000 |
| 6  | -1.114553000 | 2.101457000  | 0.946861000  | 1 | -4.450589000 | -1.504333000 | -3.354083000 | 6 | 4.003696000  | 0.697890000  | -5.962464000 |
| 6  | 0.766304000  | 4.903363000  | -1.545643000 | 6 | -1.602898000 | 7.416098000  | -0.093460000 | 1 | 4.719455000  | 0.059703000  | -6.502792000 |
| 6  | 0.526414000  | 6.220602000  | -0.984716000 | 1 | -0.908865000 | 8.131476000  | 0.372464000  | 1 | 4.084415000  | 1.722803000  | -6.354530000 |
| 6  | -1.626767000 | 4.074188000  | 2.326637000  | 1 | -2.243242000 | 7.027999000  | 0.715223000  | 1 | 2.986419000  | 0.336283000  | -6.172997000 |
| 6  | 3.536897000  | 2.765218000  | -3.090567000 | 6 | 4.288172000  | 0.677020000  | -4.441907000 | 6 | -6.997413000 | -3.732775000 | -2.928386000 |
| 6  | 1.940504000  | 1.188125000  | -3.404637000 | 1 | 4.234344000  | -0.356784000 | -4.067967000 | 1 | -6.762213000 | -4.756499000 | -2.599021000 |
| 6  | 2.267506000  | 3.175556000  | -2.519130000 | 1 | 5.312342000  | 1.027623000  | -4.254004000 | 1 | -6.200258000 | -3.411217000 | -3.615733000 |
| 6  | -5.785602000 | -2.738810000 | -0.939933000 | 6 | -1.785821000 | -1.793699000 | -3.390673000 | 1 | -7.947785000 | -3.754913000 | -3.484946000 |
| 6  | -2.093427000 | -0.478657000 | -2.795450000 | 6 | 1.571595000  | 7.284958000  | -0.810824000 | 6 | -6.196399000 | 4.946151000  | -0.784091000 |
| 6  | -3.280473000 | 3.367251000  | -1.101104000 | 1 | 2.498949000  | 6.834752000  | -0.421123000 | 1 | -6.798880000 | 4.437788000  | -1.551360000 |
| 6  | -3.335647000 | -0.031392000 | -2.270263000 | 1 | 1.231899000  | 8.013529000  | -0.059400000 | 1 | -5.448217000 | 5.564348000  | -1.301521000 |
| 6  | -3.228570000 | 2.269187000  | 2.178191000  | 6 | -5.509551000 | 3.910487000  | 0.137753000  | 1 | -6.855519000 | 5.609005000  | -0.203459000 |
| 6  | -2.704624000 | 4.618147000  | -0.860168000 | 1 | -4.946822000 | 4.438779000  | 0.923710000  | 6 | -2.476411000 | 8.150611000  | -1.137894000 |
| 1  | -3.343000000 | 5.352989000  | -0.374499000 | 1 | -6.277511000 | 3.316878000  | 0.652052000  | 1 | -3.186539000 | 7.453982000  | -1.607271000 |

|   |              |              |              |   |              |              |              |    |              |              |              |
|---|--------------|--------------|--------------|---|--------------|--------------|--------------|----|--------------|--------------|--------------|
| 1 | -1.846755000 | 8.576388000  | -1.933446000 | 6 | -4.121524000 | -3.188100000 | 0.544579000  | 1  | -7.788326000 | -4.562096000 | 2.557049000  |
| 1 | -3.046193000 | 8.966540000  | -0.668054000 | 6 | 3.365676000  | 0.356367000  | 4.421437000  | 6  | 0.756183000  | -7.910882000 | -1.178704000 |
| 6 | 1.879147000  | 8.020044000  | -2.138232000 | 6 | 4.903314000  | -1.452462000 | 1.694707000  | 1  | 0.067398000  | -8.290338000 | -0.409731000 |
| 1 | 0.972427000  | 8.509243000  | -2.524303000 | 1 | 5.905374000  | -1.037465000 | 1.608069000  | 1  | 1.718581000  | -7.698378000 | -0.690918000 |
| 1 | 2.229470000  | 7.308796000  | -2.900944000 | 6 | -0.086696000 | -1.213296000 | 3.888878000  | 1  | 0.911360000  | -8.699622000 | -1.930269000 |
| 1 | 2.655478000  | 8.786347000  | -1.991880000 | 6 | -1.440573000 | -0.987404000 | 4.334891000  | 6  | 5.519693000  | -6.454416000 | -1.256027000 |
| 6 | -7.261935000 | 1.158477000  | -1.262319000 | 6 | 1.020926000  | -0.572389000 | 4.458095000  | 1  | 4.626247000  | -6.875456000 | -0.771487000 |
| 1 | -7.523718000 | 2.226740000  | -1.243578000 | 1 | 0.814722000  | 0.074865000  | 5.308147000  | 1  | 6.315682000  | -6.391995000 | -0.499158000 |
| 1 | -8.106767000 | 0.584858000  | -0.851869000 | 6 | -3.236081000 | -3.820098000 | 1.584138000  | 1  | 5.844246000  | -7.143872000 | -2.050139000 |
| 1 | -7.131653000 | 0.869291000  | -2.316494000 | 1 | -3.265954000 | -4.908415000 | 1.451372000  | 6  | 7.843620000  | -3.157068000 | 0.720615000  |
| 6 | -2.575785000 | -3.079397000 | -3.529239000 | 1 | -3.654121000 | -3.672576000 | 2.580169000  | 1  | 7.842465000  | -4.256711000 | 0.755798000  |
| 1 | -3.326478000 | -3.197381000 | -2.743125000 | 6 | 5.214217000  | -5.051337000 | -1.833828000 | 1  | 7.529602000  | -2.788595000 | 1.708299000  |
| 1 | -1.868217000 | -3.909888000 | -3.382661000 | 1 | 6.115915000  | -4.651219000 | -2.321508000 | 1  | 8.871794000  | -2.813654000 | 0.530582000  |
| 6 | -3.230205000 | -3.243044000 | -4.921583000 | 1 | 4.442720000  | -5.141241000 | -2.616137000 | 6  | -2.920868000 | -7.005343000 | -0.128110000 |
| 1 | -3.942186000 | -2.431396000 | -5.135447000 | 6 | 3.228282000  | 1.332491000  | 5.553572000  | 1  | -2.153569000 | -7.759109000 | -0.356590000 |
| 1 | -3.771703000 | -4.199421000 | -4.982635000 | 1 | 2.251240000  | 1.838229000  | 5.486935000  | 1  | -3.890645000 | -7.370807000 | -0.498775000 |
| 1 | -2.464738000 | -3.223057000 | -5.711454000 | 1 | 3.996868000  | 2.113840000  | 5.456871000  | 1  | -2.982191000 | -6.919472000 | 0.967475000  |
| 6 | 0.330976000  | -2.789343000 | -4.516230000 | 6 | -2.275452000 | -1.660559000 | 3.465238000  | 6  | -3.780044000 | -1.481947000 | 3.516686000  |
| 1 | 0.898324000  | -2.353990000 | -5.354925000 | 6 | 6.881699000  | -2.652323000 | -0.381641000 | 1  | -4.236090000 | -1.650419000 | 2.534141000  |
| 1 | -0.333766000 | -3.549518000 | -4.950020000 | 1 | 6.919672000  | -1.551724000 | -0.429738000 | 1  | -3.968995000 | -0.424541000 | 3.747641000  |
| 6 | 1.303228000  | -3.458825000 | -3.518962000 | 1 | 7.222430000  | -3.022345000 | -1.360437000 | 6  | -4.488838000 | -2.335781000 | 4.596835000  |
| 1 | 1.903741000  | -4.237986000 | -4.014348000 | 6 | 0.183985000  | -6.631691000 | -1.835999000 | 1  | -4.367524000 | -3.415947000 | 4.425531000  |
| 1 | 0.736837000  | -3.917125000 | -2.701053000 | 1 | 0.881365000  | -6.282485000 | -2.614266000 | 1  | -5.566357000 | -2.113168000 | 4.609750000  |
| 1 | 1.980149000  | -2.719644000 | -3.071161000 | 1 | -0.758114000 | -6.877039000 | -2.346030000 | 1  | -4.080754000 | -2.119937000 | 5.594559000  |
| 7 | 3.331450000  | -3.099935000 | 0.777721000  | 6 | -2.563967000 | -5.652420000 | -0.788473000 | 6  | -1.817192000 | -0.121853000 | 5.509210000  |
| 7 | -0.078547000 | -2.049443000 | 2.793329000  | 1 | -2.477298000 | -5.817563000 | -1.873707000 | 1  | -1.081166000 | -0.279980000 | 6.313319000  |
| 7 | 0.471842000  | -3.846595000 | 0.660286000  | 1 | -3.388455000 | -4.944690000 | -0.670452000 | 1  | -2.787099000 | -0.444980000 | 5.910790000  |
| 7 | 2.775001000  | -1.316349000 | 2.917047000  | 6 | -6.303318000 | -4.507261000 | 0.931028000  | 6  | -1.891403000 | 1.386666000  | 5.175710000  |
| 6 | 3.419221000  | -4.070339000 | -0.195221000 | 1 | -5.678273000 | -5.297117000 | 1.379856000  | 1  | -1.965490000 | 1.982526000  | 6.098054000  |
| 6 | -0.044428000 | -5.532140000 | -0.834981000 | 1 | -6.977432000 | -5.006435000 | 0.216345000  | 1  | -2.776077000 | 1.598043000  | 4.565171000  |
| 6 | 4.751221000  | -4.091959000 | -0.775259000 | 6 | 6.875076000  | 0.087155000  | 4.307262000  | 1  | -1.003374000 | 1.712968000  | 4.615466000  |
| 6 | -1.244457000 | -5.087534000 | -0.308669000 | 1 | 7.018880000  | -0.901321000 | 3.846087000  | 26 | 1.542973000  | -2.269361000 | 1.499313000  |
| 6 | 4.567727000  | -2.496310000 | 0.826654000  | 1 | 6.600168000  | -0.069570000 | 5.360900000  | 8  | 1.378247000  | -0.825317000 | 0.231908000  |
| 6 | 5.462796000  | -3.087743000 | -0.151522000 | 1 | 7.831091000  | 0.631180000  | 4.271945000  | 6  | 3.399264000  | -0.043529000 | -0.775254000 |
| 6 | 4.445981000  | 0.157698000  | 3.585856000  | 6 | 5.765233000  | 0.875029000  | 3.571811000  | 6  | 2.335061000  | 0.085980000  | 0.150609000  |
| 6 | 2.330151000  | -0.561344000 | 3.979550000  | 1 | 5.645130000  | 1.864924000  | 4.036715000  | 6  | 4.485786000  | 0.833610000  | -0.782302000 |
| 6 | 4.072585000  | -0.909487000 | 2.676693000  | 1 | 6.071710000  | 1.055470000  | 2.528943000  | 6  | 3.477137000  | 2.086564000  | 1.022370000  |
| 6 | -5.430437000 | -3.523550000 | 0.200707000  | 6 | 3.356896000  | 0.647771000  | 6.935411000  | 6  | 2.412370000  | 1.184816000  | 1.046373000  |
| 6 | -1.399490000 | -2.390629000 | 2.529887000  | 1 | 3.238803000  | 1.380260000  | 7.748166000  | 6  | 4.524316000  | 1.911103000  | 0.108514000  |
| 6 | 1.004952000  | -4.748686000 | -0.235301000 | 1 | 4.342003000  | 0.168333000  | 7.036330000  | 9  | -1.289017000 | 5.308335000  | 2.763075000  |
| 6 | -1.782389000 | -3.368726000 | 1.571262000  | 1 | 2.589289000  | -0.131434000 | 7.053212000  | 9  | -4.426885000 | 1.742077000  | 2.528099000  |
| 6 | 2.349485000  | -4.856294000 | -0.615625000 | 6 | -7.145784000 | -3.832345000 | 2.039135000  | 9  | -2.712101000 | 0.319360000  | 0.948648000  |
| 1 | 2.569468000  | -5.595002000 | -1.383337000 | 1 | -7.786432000 | -3.048551000 | 1.606953000  | 9  | 3.531797000  | 3.099749000  | 1.913430000  |
| 6 | -0.903512000 | -4.044578000 | 0.676819000  | 1 | -6.489482000 | -3.356299000 | 2.782357000  | 9  | 5.566305000  | 2.774713000  | 0.089690000  |



|   |             |             |              |   |              |              |              |   |             |             |             |
|---|-------------|-------------|--------------|---|--------------|--------------|--------------|---|-------------|-------------|-------------|
| 9 | 1.489479000 | 1.321522000 | 2.015986000  | 9 | 3.410612000  | -1.090917000 | -1.630853000 | 9 | 0.446222000 | 3.886929000 | 1.207054000 |
| 9 | 5.518242000 | 0.637796000 | -1.636256000 | 9 | -3.754485000 | 4.246050000  | 3.402903000  |   |             |             |             |

**2f (exo-exo):**

|    |              |              |              |   |              |              |              |   |              |              |              |
|----|--------------|--------------|--------------|---|--------------|--------------|--------------|---|--------------|--------------|--------------|
| 26 | 2.640421000  | -0.927296000 | 0.302418000  | 1 | 4.780938000  | 2.538675000  | 2.252450000  | 1 | 9.836185000  | -0.789511000 | -1.042717000 |
| 8  | 4.013106000  | -0.972111000 | 1.609113000  | 1 | 3.783509000  | 2.379678000  | 3.724668000  | 6 | 4.583651000  | -0.152026000 | 4.476457000  |
| 7  | 2.336261000  | 1.151687000  | 0.178718000  | 1 | 3.532112000  | 1.275657000  | 2.346694000  | 1 | 3.834172000  | -0.732185000 | 3.925353000  |
| 7  | 2.247724000  | -2.929399000 | -0.221143000 | 6 | 3.785615000  | -3.060182000 | -2.160446000 | 1 | 4.078114000  | 0.409244000  | 5.279042000  |
| 7  | 0.945038000  | -1.068120000 | 1.499290000  | 1 | 4.211162000  | -3.757873000 | -2.880298000 | 1 | 5.301748000  | -0.846813000 | 4.939948000  |
| 7  | -2.175794000 | -3.320118000 | 1.395755000  | 6 | 5.318679000  | 0.841507000  | 3.535477000  | 6 | 6.477294000  | 1.045611000  | -3.333381000 |
| 1  | -1.656049000 | -2.457175000 | 1.312786000  | 6 | -0.189971000 | -4.630783000 | 2.196304000  | 1 | 5.992354000  | 1.992834000  | -3.623077000 |
| 7  | 3.730736000  | -0.712623000 | -1.464433000 | 1 | 0.188703000  | -5.611534000 | 1.905039000  | 1 | 6.936066000  | 0.630590000  | -4.243595000 |
| 6  | 1.453469000  | 1.892879000  | 0.925272000  | 1 | -0.059604000 | -4.607986000 | 3.283605000  | 6 | 7.273382000  | -2.864938000 | -3.168733000 |
| 6  | -0.452539000 | -0.456664000 | 3.233474000  | 6 | 0.956404000  | 4.400725000  | 1.463859000  | 1 | 7.868305000  | -3.511346000 | -3.831685000 |
| 6  | 6.046192000  | 0.065990000  | 2.419152000  | 1 | -0.113614000 | 4.154690000  | 1.490660000  | 1 | 6.828328000  | -3.486615000 | -2.377999000 |
| 6  | 1.696730000  | 3.313358000  | 0.745655000  | 1 | 1.046980000  | 5.340787000  | 0.900904000  | 1 | 7.946770000  | -2.140005000 | -2.689163000 |
| 6  | -0.316642000 | -1.830874000 | 3.301984000  | 6 | 6.166252000  | -2.126903000 | -3.960324000 | 6 | -3.020462000 | -7.201058000 | 3.478456000  |
| 6  | 5.340825000  | -0.820600000 | 1.535782000  | 1 | 6.627710000  | -1.506861000 | -4.744062000 | 1 | -4.068072000 | -6.887672000 | 3.604995000  |
| 6  | 3.143905000  | 2.056275000  | -0.466339000 | 1 | 5.531625000  | -2.868317000 | -4.472575000 | 1 | -2.410572000 | -6.626588000 | 4.192681000  |
| 6  | 2.758614000  | 3.416286000  | -0.124122000 | 6 | 1.248217000  | -5.013459000 | -0.474363000 | 1 | -2.943764000 | -8.269895000 | 3.734340000  |
| 6  | 7.428909000  | 0.195238000  | 2.211000000  | 6 | 3.443493000  | 4.656221000  | -0.616858000 | 6 | -0.373182000 | 0.935044000  | 5.348586000  |
| 1  | 7.986922000  | 0.873511000  | 2.853485000  | 1 | 2.767857000  | 5.515359000  | -0.492229000 | 1 | 0.518260000  | 1.472563000  | 4.991751000  |
| 6  | 5.452355000  | 0.084710000  | -2.803991000 | 1 | 3.639446000  | 4.564791000  | -1.697082000 | 1 | -0.032005000 | 0.083838000  | 5.956592000  |
| 6  | 4.247941000  | -1.746698000 | -2.218309000 | 6 | -1.221307000 | 0.445051000  | 4.154111000  | 1 | -0.958028000 | 1.611495000  | 5.990544000  |
| 6  | 4.440353000  | 0.414972000  | -1.817750000 | 1 | -2.114262000 | -0.077328000 | 4.520160000  | 6 | 1.473578000  | 4.604898000  | 2.908078000  |
| 6  | -2.653147000 | -5.477238000 | 1.655204000  | 1 | -1.600909000 | 1.306538000  | 3.589232000  | 1 | 2.536678000  | 4.888809000  | 2.907257000  |
| 6  | 1.328547000  | -3.797634000 | 0.350276000  | 6 | -0.872922000 | -2.637682000 | 4.452464000  | 1 | 1.376500000  | 3.673810000  | 3.485622000  |
| 6  | 0.356681000  | -0.000986000 | 2.130954000  | 1 | -1.493187000 | -3.478339000 | 4.115608000  | 1 | 0.898956000  | 5.393821000  | 3.417922000  |
| 6  | 0.641077000  | -3.516358000 | 1.564040000  | 1 | -1.547782000 | -1.988102000 | 5.027149000  | 6 | 9.924021000  | 1.253572000  | 0.809960000  |
| 6  | 7.442155000  | -1.403607000 | 0.409754000  | 6 | -2.548513000 | -6.930450000 | 2.030566000  | 1 | 9.440262000  | 1.565370000  | -0.127315000 |
| 1  | 7.948279000  | -1.984892000 | -0.359389000 | 1 | -1.503604000 | -7.264259000 | 1.922315000  | 1 | 11.006709000 | 1.440412000  | 0.726824000  |
| 6  | 0.529363000  | 1.352586000  | 1.812514000  | 1 | -3.148423000 | -7.539490000 | 1.335082000  | 1 | 9.528598000  | 1.877525000  | 1.624407000  |
| 1  | -0.083707000 | 2.063658000  | 2.360705000  | 6 | 6.290313000  | 1.671262000  | 4.405114000  | 6 | 4.772509000  | 4.926562000  | 0.127928000  |
| 6  | 0.512818000  | -2.221512000 | 2.143290000  | 1 | 7.050795000  | 1.034954000  | 4.883625000  | 1 | 5.466390000  | 4.082063000  | 0.001902000  |
| 6  | -1.644174000 | -4.523013000 | 1.795024000  | 1 | 5.716072000  | 2.175861000  | 5.196441000  | 1 | 4.588944000  | 5.050683000  | 1.205410000  |
| 6  | 5.321364000  | -1.264364000 | -3.067420000 | 1 | 6.804849000  | 2.443910000  | 3.813013000  | 1 | 5.259389000  | 5.837886000  | -0.252105000 |
| 6  | 4.168354000  | 1.705839000  | -1.349419000 | 6 | 7.579085000  | 1.338150000  | -2.284543000 | 6 | 0.244144000  | -3.125094000 | 5.406816000  |
| 1  | 4.766465000  | 2.516271000  | -1.762221000 | 1 | 8.082858000  | 0.407411000  | -1.989069000 | 1 | 0.980115000  | -3.751165000 | 4.880751000  |
| 6  | 6.064394000  | -1.562091000 | 0.570705000  | 1 | 7.141005000  | 1.773864000  | -1.375262000 | 1 | -0.179940000 | -3.709683000 | 6.237477000  |
| 1  | 5.508200000  | -2.254448000 | -0.057947000 | 1 | 8.329230000  | 2.036614000  | -2.685941000 | 1 | 0.785346000  | -2.263146000 | 5.824800000  |
| 6  | 2.801951000  | -3.574750000 | -1.301577000 | 6 | 9.666190000  | -0.252207000 | 1.079662000  | 6 | 0.315024000  | -6.204720000 | -0.440788000 |
| 6  | 8.155455000  | -0.500170000 | 1.218222000  | 6 | 10.291094000 | -1.060170000 | -0.077696000 | 1 | 0.079947000  | -6.463295000 | -1.485508000 |
| 6  | 2.194390000  | -4.870589000 | -1.471636000 | 1 | 10.162729000 | -2.142365000 | 0.074572000  | 1 | -0.644761000 | -5.954373000 | 0.023925000  |
| 6  | 4.286087000  | 1.818159000  | 2.920644000  | 1 | 11.368931000 | -0.846105000 | -0.134533000 | 6 | 10.378453000 | -0.659293000 | 2.395763000  |

|   |              |              |              |   |              |              |              |    |              |              |              |
|---|--------------|--------------|--------------|---|--------------|--------------|--------------|----|--------------|--------------|--------------|
| 1 | 9.988910000  | -0.087405000 | 3.250452000  | 1 | -4.351020000 | -2.559743000 | -0.758859000 | 1  | -0.989298000 | 6.558939000  | -3.782270000 |
| 1 | 11.460599000 | -0.467432000 | 2.315498000  | 6 | 2.092133000  | 2.936084000  | -3.832474000 | 1  | -0.027825000 | 5.742369000  | -5.035701000 |
| 1 | 10.226497000 | -1.729981000 | 2.600809000  | 1 | 2.675565000  | 2.093862000  | -3.433207000 | 1  | 0.369267000  | 7.419009000  | -4.561914000 |
| 6 | 0.936710000  | -7.457469000 | 0.223105000  | 1 | 2.791602000  | 3.778138000  | -3.953830000 | 6  | -3.113281000 | -3.253463000 | -3.054307000 |
| 1 | 1.854024000  | -7.754815000 | -0.306442000 | 6 | -3.938717000 | 6.349312000  | 3.217267000  | 1  | -3.981435000 | -2.615176000 | -2.837258000 |
| 1 | 0.229208000  | -8.300089000 | 0.196405000  | 1 | -3.507590000 | 7.344170000  | 3.408203000  | 1  | -3.477269000 | -4.263844000 | -3.297705000 |
| 1 | 1.211186000  | -7.272939000 | 1.272648000  | 1 | -3.787023000 | 5.755544000  | 4.133364000  | 1  | -2.617426000 | -2.838000000 | -3.943316000 |
| 6 | 2.454138000  | -5.798878000 | -2.626775000 | 6 | -4.448192000 | -0.267317000 | 2.552083000  | 6  | -5.048324000 | -1.517378000 | 3.154079000  |
| 1 | 2.150241000  | -6.820219000 | -2.357726000 | 6 | 0.983481000  | 5.897461000  | -3.100829000 | 1  | -4.885754000 | -1.474228000 | 4.243239000  |
| 1 | 3.534922000  | -5.839828000 | -2.837912000 | 1 | 1.996057000  | 5.794703000  | -3.519445000 | 1  | -4.535334000 | -2.420952000 | 2.806714000  |
| 6 | 1.703088000  | -5.358468000 | -3.906372000 | 1 | 1.052517000  | 6.630358000  | -2.279918000 | 6  | -6.570696000 | -1.639629000 | 2.903195000  |
| 1 | 1.905502000  | -6.049416000 | -4.738949000 | 6 | 0.503833000  | -1.967792000 | -2.881166000 | 1  | -7.104450000 | -0.784247000 | 3.343298000  |
| 1 | 2.013482000  | -4.347214000 | -4.205268000 | 1 | 0.559235000  | -3.047521000 | -2.696325000 | 1  | -6.965332000 | -2.564818000 | 3.349888000  |
| 1 | 0.617394000  | -5.337456000 | -3.728077000 | 1 | 1.489904000  | -1.564499000 | -2.614828000 | 1  | -6.804186000 | -1.648424000 | 1.829072000  |
| 7 | -0.752197000 | 3.038899000  | -1.379633000 | 6 | -2.133516000 | -3.301049000 | -1.856190000 | 6  | -5.213948000 | 1.298642000  | 4.477393000  |
| 7 | -3.241862000 | 1.256496000  | 1.285619000  | 1 | -2.593646000 | -3.853014000 | -1.032136000 | 1  | -5.901916000 | 0.487520000  | 4.752862000  |
| 7 | -1.588960000 | 0.304553000  | -0.773604000 | 1 | -1.246338000 | -3.882296000 | -2.146898000 | 1  | -5.833776000 | 2.199918000  | 4.337856000  |
| 7 | -2.479923000 | 4.017817000  | 0.650271000  | 6 | -5.110983000 | -5.439519000 | 0.714026000  | 6  | -4.225701000 | 1.548956000  | 5.641954000  |
| 6 | 0.203180000  | 2.372730000  | -2.110001000 | 1 | -5.908941000 | -4.679126000 | 0.692022000  | 1  | -4.766139000 | 1.864324000  | 6.547232000  |
| 6 | -0.527435000 | -1.349980000 | -1.982721000 | 1 | -5.421880000 | -6.202148000 | 1.447234000  | 1  | -3.500961000 | 2.331848000  | 5.375978000  |
| 6 | 1.015683000  | 3.314198000  | -2.858154000 | 6 | -3.307433000 | 8.307288000  | -0.335940000 | 1  | -3.661762000 | 0.635178000  | 5.876512000  |
| 6 | -1.676255000 | -1.917613000 | -1.460863000 | 1 | -4.356195000 | 8.162806000  | -0.036744000 | 26 | -2.375153000 | 2.184189000  | -0.362950000 |
| 6 | -0.553869000 | 4.381343000  | -1.613910000 | 1 | -3.147999000 | 7.764157000  | -1.279225000 | 8  | -3.838171000 | 2.248448000  | -1.585688000 |
| 6 | 0.530714000  | 4.572042000  | -2.560249000 | 1 | -3.138659000 | 9.379890000  | -0.516347000 | 6  | -4.887015000 | 0.563833000  | -2.992973000 |
| 6 | -2.554291000 | 6.309063000  | 1.020929000  | 6 | -2.355414000 | 7.775283000  | 0.762598000  | 6  | -4.772470000 | 1.297951000  | -1.764809000 |
| 6 | -3.172651000 | 4.271336000  | 1.811953000  | 1 | -1.312471000 | 7.960429000  | 0.455686000  | 6  | -5.824973000 | -0.482752000 | -3.020357000 |
| 6 | -2.081112000 | 5.240933000  | 0.156613000  | 1 | -2.518332000 | 8.338204000  | 1.694163000  | 1  | -5.914611000 | -1.073244000 | -3.929757000 |
| 6 | -3.816323000 | -4.802435000 | 1.142978000  | 6 | -5.456816000 | 6.489934000  | 2.947951000  | 6  | -6.603539000 | -0.019357000 | -0.791886000 |
| 6 | -3.650520000 | -0.063641000 | 1.337752000  | 1 | -5.968079000 | 6.950815000  | 3.806959000  | 1  | -7.255361000 | -0.205155000 | 0.060669000  |
| 6 | -0.522537000 | 0.038454000  | -1.593319000 | 1 | -5.905686000 | 5.503244000  | 2.760489000  | 6  | -5.670978000 | 1.018074000  | -0.708011000 |
| 6 | -3.353005000 | -1.016103000 | 0.321727000  | 1 | -5.631570000 | 7.114781000  | 2.059570000  | 1  | -5.585224000 | 1.611671000  | 0.200604000  |
| 6 | 0.338968000  | 0.986242000  | -2.155511000 | 6 | -4.997423000 | -6.097824000 | -0.681813000 | 6  | -6.678594000 | -0.819162000 | -1.945560000 |
| 1 | 1.158648000  | 0.599199000  | -2.755163000 | 1 | -4.216164000 | -6.872821000 | -0.676604000 | 6  | -4.392773000 | 2.407560000  | -4.632280000 |
| 6 | -2.304772000 | -0.871902000 | -0.628571000 | 1 | -4.721089000 | -5.348454000 | -1.438013000 | 1  | -5.463105000 | 2.513384000  | -4.869371000 |
| 6 | -3.472696000 | -3.462366000 | 0.976729000  | 1 | -5.948741000 | -6.562222000 | -0.986360000 | 1  | -3.809600000 | 2.690958000  | -5.523596000 |
| 6 | -3.221757000 | 5.701780000  | 2.066746000  | 6 | 0.246976000  | -1.714403000 | -4.384074000 | 1  | -4.140677000 | 3.092075000  | -3.812598000 |
| 6 | -1.222717000 | 5.408315000  | -0.936425000 | 1 | 0.203624000  | -0.636113000 | -4.593680000 | 6  | -4.063400000 | 0.942235000  | -4.240031000 |
| 1 | -0.961179000 | 6.430380000  | -1.206324000 | 1 | -0.707438000 | -2.156112000 | -4.703836000 | 6  | -4.388860000 | 0.043914000  | -5.454756000 |
| 6 | -3.804515000 | 1.905488000  | 2.363685000  | 1 | 1.053287000  | -2.156431000 | -4.989589000 | 1  | -4.139973000 | -1.009345000 | -5.253566000 |
| 6 | -4.532163000 | 0.963297000  | 3.177896000  | 6 | 1.507520000  | 2.548273000  | -5.212013000 | 1  | -3.788669000 | 0.378769000  | -6.313857000 |
| 6 | -3.762140000 | 3.285320000  | 2.608308000  | 1 | 0.951597000  | 3.391728000  | -5.647995000 | 1  | -5.451909000 | 0.104264000  | -5.734664000 |
| 1 | -4.288872000 | 3.630391000  | 3.496631000  | 1 | 0.809677000  | 1.704441000  | -5.106568000 | 6  | -7.648888000 | -2.002829000 | -2.095805000 |
| 6 | -4.161839000 | -2.308081000 | 0.292519000  | 1 | 2.307178000  | 2.255737000  | -5.909822000 | 6  | -8.474733000 | -2.253170000 | -0.816242000 |
| 1 | -5.154227000 | -2.128396000 | 0.714142000  | 6 | 0.026390000  | 6.442019000  | -4.188306000 | 1  | -7.820651000 | -2.485527000 | 0.037607000  |

|   |              |              |              |   |              |              |              |   |              |              |              |
|---|--------------|--------------|--------------|---|--------------|--------------|--------------|---|--------------|--------------|--------------|
| 1 | -9.146858000 | -3.109629000 | -0.975165000 | 1 | -2.287204000 | -0.199501000 | -3.657305000 | 6 | -6.854564000 | -3.296924000 | -2.407723000 |
| 1 | -9.088434000 | -1.378190000 | -0.554607000 | 6 | -8.630897000 | -1.720636000 | -3.262567000 | 1 | -6.255820000 | -3.191612000 | -3.323214000 |
| 6 | -2.545699000 | 0.820293000  | -3.968637000 | 1 | -9.220678000 | -0.813937000 | -3.059051000 | 1 | -7.548025000 | -4.141994000 | -2.544011000 |
| 1 | -2.226917000 | 1.512002000  | -3.185838000 | 1 | -9.323043000 | -2.568679000 | -3.388749000 | 1 | -6.173767000 | -3.540347000 | -1.580201000 |
| 1 | -1.988798000 | 1.053028000  | -4.891134000 | 1 | -8.089793000 | -1.573530000 | -4.208591000 |   |              |              |              |

## 2f (exo-endo):

|    |              |              |              |   |              |              |              |    |               |              |              |
|----|--------------|--------------|--------------|---|--------------|--------------|--------------|----|---------------|--------------|--------------|
| 26 | 3.567448000  | -0.778724000 | -0.201496000 | 6 | 2.510765000  | -4.344305000 | -4.519996000 | 6  | -6.437203000  | -2.238769000 | 1.985122000  |
| 8  | 5.269784000  | -0.362382000 | -0.829305000 | 6 | 4.741584000  | -2.735068000 | 5.042404000  | 6  | -0.618138000  | 6.202140000  | 0.465628000  |
| 7  | 3.176776000  | -2.543202000 | -1.284709000 | 6 | 3.172887000  | 2.948436000  | 1.968994000  | 6  | -2.919885000  | 2.212537000  | 1.868806000  |
| 7  | 3.132313000  | 0.780247000  | 1.136418000  | 6 | 3.876454000  | -6.127507000 | -2.185747000 | 6  | -5.667864000  | 2.216227000  | -1.496438000 |
| 7  | 2.343037000  | 0.278732000  | -1.545349000 | 6 | 0.638719000  | 0.592423000  | -4.871566000 | 6  | -3.137484000  | 3.182052000  | 0.857412000  |
| 7  | -0.223915000 | 4.026321000  | 0.165522000  | 6 | 0.587887000  | 3.218487000  | -3.214456000 | 6  | -6.781844000  | 1.491167000  | -1.924341000 |
| 7  | 3.870570000  | -2.062573000 | 1.442718000  | 6 | 1.678736000  | 7.148431000  | -0.375901000 | 6  | -4.008009000  | 3.010556000  | -0.254649000 |
| 6  | 2.705282000  | -2.593973000 | -2.570415000 | 6 | 8.265779000  | 0.469960000  | -4.006450000 | 6  | -1.175889000  | 4.935482000  | 0.579975000  |
| 6  | 1.250933000  | 0.799549000  | -3.511875000 | 6 | 6.413364000  | -5.602944000 | 2.725392000  | 6  | -5.162141000  | -2.823843000 | 3.765605000  |
| 6  | 7.466909000  | 0.267849000  | -1.580672000 | 6 | 10.613455000 | 1.204737000  | 0.469614000  | 6  | -7.469636000  | -2.248937000 | 1.052668000  |
| 6  | 2.881264000  | -3.927173000 | -3.124321000 | 6 | 10.874545000 | 1.298409000  | 1.985198000  | 6  | -3.093534000  | 0.324610000  | 3.027512000  |
| 6  | 1.282708000  | 1.951698000  | -2.760766000 | 6 | 5.935319000  | 1.116327000  | -3.408308000 | 6  | -2.083320000  | 1.111468000  | 3.688398000  |
| 6  | 6.520529000  | 0.004404000  | -0.542113000 | 6 | 4.942397000  | -5.286778000 | 3.061866000  | 6  | -3.561098000  | -0.886697000 | 3.543441000  |
| 6  | 3.620398000  | -3.806398000 | -0.985113000 | 6 | 6.166299000  | -2.249538000 | 5.375915000  | 6  | -2.557700000  | 4.580853000  | 1.080713000  |
| 6  | 3.460500000  | -4.683996000 | -2.133909000 | 6 | 1.518753000  | 7.704680000  | -1.804067000 | 6  | -9.439103000  | 0.165527000  | -2.908748000 |
| 6  | 8.752875000  | 0.646575000  | -1.184583000 | 6 | 1.658612000  | 0.592341000  | -6.029150000 | 6  | -4.571722000  | -3.462746000 | 4.991663000  |
| 6  | 4.536596000  | -3.878372000 | 2.727265000  | 6 | 3.571141000  | -3.975826000 | -5.576374000 | 6  | -1.985689000  | 2.301437000  | 3.008065000  |
| 6  | 4.042913000  | -1.668993000 | 2.746022000  | 6 | 11.600464000 | 0.170754000  | -0.123987000 | 6  | -9.898849000  | -2.332244000 | -0.902059000 |
| 6  | 4.164085000  | -3.404997000 | 1.404235000  | 6 | 5.385622000  | -6.325513000 | -2.429326000 | 6  | -5.757762000  | 3.942364000  | -3.453735000 |
| 6  | 0.711862000  | 6.041596000  | -0.042539000 | 6 | 1.380991000  | 4.066694000  | -4.228896000 | 6  | -3.348843000  | 5.101063000  | -1.853875000 |
| 6  | 2.874444000  | 2.100795000  | 0.800020000  | 6 | 3.186835000  | 4.447793000  | 2.162177000  | 6  | -1.265155000  | 7.504164000  | 0.862397000  |
| 6  | 1.921232000  | -0.224450000 | -2.750306000 | 6 | 10.896272000 | 2.593544000  | -0.152334000 | 6  | -8.465583000  | -3.969070000 | 4.121574000  |
| 6  | 2.338489000  | 2.500402000  | -0.452267000 | 6 | 4.543391000  | 5.091004000  | 1.805086000  | 6  | -7.201111000  | -4.359505000 | 3.330825000  |
| 6  | 8.215077000  | 0.511293000  | 1.143186000  | 6 | 3.945896000  | 2.466273000  | 4.390631000  | 6  | -5.014418000  | -2.799556000 | 6.311161000  |
| 6  | 2.110852000  | -1.523985000 | -3.225875000 | 6 | 2.785729000  | 2.408711000  | 5.402868000  | 6  | -0.942801000  | 7.942515000  | 2.304322000  |
| 6  | 2.001375000  | 1.619123000  | -1.515203000 | 7 | -6.838311000 | -0.252950000 | -0.220346000 | 6  | -7.067010000  | 4.741800000  | -3.288275000 |
| 6  | 0.930988000  | 4.681276000  | -0.212666000 | 7 | -3.565087000 | 0.984771000  | 1.920110000  | 6  | -10.417687000 | 1.299417000  | -2.544361000 |
| 6  | 4.452572000  | -2.795076000 | 3.568189000  | 7 | -4.913345000 | 1.970197000  | -0.374341000 | 6  | -11.004387000 | -2.004450000 | 0.121005000  |
| 6  | 4.083710000  | -4.204712000 | 0.266900000  | 7 | -5.435796000 | -1.297714000 | 2.036744000  | 6  | -4.030403000  | 6.469305000  | -1.653048000 |
| 6  | 6.920691000  | 0.131651000  | 0.800910000  | 6 | -7.360450000 | 0.383947000  | -1.317583000 | 6  | -1.069748000  | 3.404670000  | 3.492988000  |
| 6  | 3.522521000  | 0.760892000  | 2.452459000  | 6 | -5.196429000 | 3.401011000  | -2.166039000 | 6  | -1.698069000  | 4.276828000  | 4.599382000  |
| 6  | 9.167548000  | 0.780659000  | 0.154174000  | 6 | -8.575657000 | -0.277955000 | -1.761015000 | 6  | -1.299488000  | 0.662271000  | 4.892734000  |
| 6  | 3.548785000  | 2.099663000  | 2.983911000  | 6 | -4.164186000 | 3.908017000  | -1.410574000 | 6  | -0.174146000  | -0.333731000 | 4.547640000  |
| 6  | 6.647728000  | -1.316181000 | -3.374066000 | 6 | -7.669077000 | -1.314535000 | 0.038625000  | 26 | -4.890453000  | 0.084448000  | 0.545461000  |
| 6  | 3.888870000  | -0.363945000 | 3.196405000  | 6 | -8.770733000 | -1.338599000 | -0.909241000 | 8  | -3.863905000  | -0.932812000 | -0.639376000 |
| 6  | 7.086538000  | 0.137497000  | -3.069408000 | 6 | -6.277545000 | -3.204686000 | 3.059443000  | 6  | -3.186112000  | -2.838156000 | -1.966879000 |
| 6  | 2.177039000  | 3.993352000  | -0.718879000 | 6 | -4.656234000 | -1.626730000 | 3.116367000  | 6  | -3.217149000  | -2.102065000 | -0.742103000 |

|                       |              |              |              |   |               |              |              |    |              |              |              |
|-----------------------|--------------|--------------|--------------|---|---------------|--------------|--------------|----|--------------|--------------|--------------|
| 6                     | -2.536341000 | -4.076710000 | -1.944436000 | 6 | -3.543999000  | 1.025100000  | 3.198696000  | 6  | 6.149301000  | -2.096200000 | -2.053304000 |
| 6                     | -1.888473000 | -3.843467000 | 0.344686000  | 6 | -2.256699000  | -4.034200000 | -2.746404000 | 6  | 0.287501000  | 6.368300000  | -0.838604000 |
| 6                     | -2.536194000 | -2.612508000 | 0.378089000  | 6 | -2.661199000  | 2.011400000  | 3.767296000  | 6  | 2.387801000  | 2.116700000  | -1.857404000 |
| 6                     | -1.891730000 | -4.621137000 | -0.818559000 | 6 | -0.632599000  | -4.519700000 | 1.163696000  | 6  | 5.321801000  | 2.414300000  | 1.325996000  |
| 6                     | -1.268096000 | -6.026617000 | -0.892949000 | 6 | -4.087499000  | -0.020800000 | 3.947196000  | 6  | 2.609101000  | 3.137800000  | -0.903304000 |
| 6                     | -0.479275000 | -6.379886000 | 0.382901000  | 6 | -1.612199000  | -3.338000000 | 1.022596000  | 6  | 6.533701000  | 1.812800000  | 1.670296000  |
| 6                     | -2.399944000 | -7.068874000 | -1.068579000 | 6 | -2.837299000  | 4.671200000  | 0.339996000  | 6  | 3.523201000  | 3.027100000  | 0.182696000  |
| 6                     | -0.298699000 | -6.127480000 | -2.093462000 | 6 | -8.392799000  | -1.453300000 | -3.582404000 | 6  | 0.702501000  | 5.044400000  | -0.792104000 |
| 6                     | -3.845499000 | -2.307914000 | -3.256035000 | 6 | -5.315299000  | -2.158700000 | 5.866196000  | 6  | 4.726501000  | -2.904600000 | -3.623604000 |
| 6                     | -5.377012000 | -2.222873000 | -3.061335000 | 6 | -2.434199000  | 2.959400000  | 2.798696000  | 6  | 7.265401000  | -1.979600000 | -1.230004000 |
| 6                     | -3.279433000 | -0.909073000 | -3.602936000 | 6 | -9.065399000  | -3.432200000 | -1.113404000 | 6  | 2.534001000  | 0.155200000  | -2.884304000 |
| 6                     | -3.581302000 | -3.221607000 | -4.470825000 | 6 | -5.250099000  | 2.721900000  | -4.322904000 | 6  | 1.501801000  | 0.894400000  | -3.570504000 |
| <b>2f (endo-endo)</b> |              |              |              | 6 | -3.317299000  | 4.532400000  | -2.700304000 | 6  | 3.012701000  | -1.073600000 | -3.346404000 |
| 26                    | -4.777999000 | -0.026900000 | 0.593296000  | 6 | -1.918500000  | 7.649800000  | -0.256304000 | 6  | 2.070901000  | 4.542400000  | -1.203004000 |
| 8                     | -3.428299000 | -1.215800000 | 0.114196000  | 6 | -2.795699000  | -3.598400000 | 1.984896000  | 6  | 9.384001000  | 0.765900000  | 2.430196000  |
| 7                     | -6.454399000 | -0.811800000 | -0.420204000 | 6 | -8.860199000  | -3.357700000 | 4.367896000  | 6  | 4.053901000  | -3.675000000 | -4.725804000 |
| 7                     | -3.815099000 | 1.327600000  | 1.886496000  | 6 | -1.824199000  | -5.109900000 | -3.759204000 | 6  | 1.432601000  | 2.132700000  | -2.979804000 |
| 7                     | -4.717699000 | 1.549600000  | -0.797104000 | 6 | -2.424299000  | -4.867900000 | -5.157504000 | 6  | 9.872801000  | -1.768500000 | 0.475096000  |
| 7                     | -0.369199000 | 4.290000000  | -0.348204000 | 6 | -0.853299000  | -2.058600000 | 1.451796000  | 6  | 5.343601000  | 4.159700000  | 3.271496000  |
| 7                     | -5.575199000 | -1.015500000 | 2.290196000  | 6 | -7.421199000  | -3.795300000 | 4.029696000  | 6  | 2.704701000  | 5.016700000  | 1.803596000  |
| 6                     | -6.774799000 | -0.539200000 | -1.725704000 | 6 | -6.072399000  | -1.192000000 | 6.798396000  | 6  | 1.090600000  | 7.543800000  | -1.334304000 |
| 6                     | -4.848299000 | 2.533500000  | -2.884104000 | 6 | -1.720200000  | 8.384000000  | 1.084096000  | 6  | 8.063601000  | -3.796100000 | -4.303004000 |
| 6                     | -2.142899000 | -3.186200000 | -0.415204000 | 6 | -6.658399000  | 3.321700000  | -4.515704000 | 6  | 6.930801000  | -4.237100000 | -3.354704000 |
| 6                     | -7.782099000 | -1.467800000 | -2.208804000 | 6 | -9.553299000  | -0.449900000 | -3.734504000 | 6  | 4.287401000  | -3.081200000 | -6.129304000 |
| 6                     | -4.022299000 | 3.326900000  | -2.122904000 | 6 | -0.282299000  | -5.114800000 | -3.893004000 | 6  | 0.881300000  | 7.849700000  | -2.830404000 |
| 6                     | -3.029099000 | -2.126000000 | -0.780304000 | 6 | -10.415599000 | -3.035500000 | -0.483804000 | 6  | 6.533301000  | 5.111700000  | 3.030096000  |
| 6                     | -7.229399000 | -1.885300000 | -0.050604000 | 6 | -4.192199000  | 5.795600000  | -2.828104000 | 6  | 10.209301000 | 1.967800000  | 1.929496000  |
| 6                     | -8.067099000 | -2.308900000 | -1.160004000 | 6 | -1.545299000  | 4.155500000  | 3.065896000  | 6  | 10.839601000 | -1.387400000 | -0.663504000 |
| 6                     | -1.795899000 | -4.096400000 | -1.417704000 | 6 | -2.294799000  | -6.501200000 | -3.269904000 | 6  | 3.217201000  | 6.463700000  | 1.675696000  |
| 6                     | -6.522899000 | -2.658100000 | 3.629596000  | 6 | -2.246599000  | 5.300100000  | 3.826496000  | 6  | 0.539801000  | 3.221500000  | -3.532104000 |
| 6                     | -5.046499000 | -0.944400000 | 3.552896000  | 6 | -2.098099000  | 1.961400000  | 5.162996000  | 6  | 1.184901000  | 4.001700000  | -4.696304000 |
| 6                     | -6.471799000 | -2.055300000 | 2.307096000  | 6 | -0.926899000  | 0.972200000  | 5.316196000  | 6  | 0.687701000  | 0.378600000  | -4.726904000 |
| 6                     | -1.074799000 | 6.409400000  | -0.403704000 | 7 | 6.579801000   | -0.003100000 | 0.041896000  | 6  | -0.493799000 | -0.507000000 | -4.287204000 |
| 6                     | -3.177099000 | 2.524300000  | 1.601596000  | 7 | 3.037901000   | 0.891300000  | -1.842604000 | 26 | 4.550301000  | 0.141500000  | -0.552704000 |
| 6                     | -5.290199000 | 1.451100000  | -2.042904000 | 7 | 4.521101000   | 2.072800000  | 0.259696000  | 8  | 3.719801000  | -0.884800000 | 0.776096000  |
| 6                     | -3.274999000 | 3.204500000  | 0.358896000  | 7 | 5.074501000   | -1.237800000 | -2.045004000 | 6  | 3.455401000  | -2.420400000 | 2.625296000  |
| 6                     | -3.108399000 | -2.972800000 | -3.071604000 | 6 | 7.148501000   | 0.729600000  | 1.052496000  | 6  | 3.611801000  | -2.140200000 | 1.235296000  |
| 6                     | -6.209799000 | 0.489900000  | -2.468604000 | 6 | 4.774301000   | 3.554200000  | 2.016796000  | 6  | 3.390401000  | -3.770300000 | 3.005096000  |
| 6                     | -3.954599000 | 2.707700000  | -0.786904000 | 6 | 8.456701000   | 0.196900000  | 1.392996000  | 6  | 3.568901000  | -4.536200000 | 0.749596000  |
| 6                     | -1.460999000 | 5.107800000  | -0.115004000 | 6 | 3.652501000   | 3.943700000  | 1.320896000  | 6  | 3.637001000  | -3.217400000 | 0.324296000  |
| 6                     | -5.630499000 | -1.963400000 | 4.409496000  | 6 | 7.477101000   | -0.993200000 | -0.268604000 | 6  | 3.457901000  | -4.850600000 | 2.113196000  |
| 6                     | -7.225099000 | -2.471000000 | 1.212296000  | 6 | 8.664201000   | -0.878900000 | 0.562896000  | 6  | 4.787801000  | -0.595300000 | 3.721996000  |
| 6                     | -3.480699000 | -2.038200000 | -2.109404000 | 6 | 5.948401000   | -3.143500000 | -3.039904000 | 6  | 3.413101000  | -1.301800000 | 3.685596000  |
|                       |              |              |              | 6 | 4.199701000   | -1.705100000 | -2.996104000 | 6  | 3.123301000  | -1.836500000 | 5.103996000  |

|   |             |              |             |   |             |              |             |   |             |              |            |
|---|-------------|--------------|-------------|---|-------------|--------------|-------------|---|-------------|--------------|------------|
| 6 | 3.449701000 | -6.320100000 | 2.574396000 | 6 | 2.305601000 | -0.275000000 | 3.350696000 | 6 | 2.317901000 | -7.098200000 | 1.86239600 |
| 6 | 4.809501000 | -6.966700000 | 2.212496000 | 6 | 3.240201000 | -6.462500000 | 4.094296000 |   |             |              |            |
